# Mitigating outbreaks in congregate settings by decreasing the size of the susceptible population

Seth Blumberg<sup>1,2,3,\*</sup>, Phoebe Lu<sup>1,2</sup>, Christopher M. Hoover<sup>1,2</sup>, James O. Lloyd-Smith<sup>4</sup>, Ada T. Kwan<sup>3</sup>, David Sears<sup>3</sup>, Stefano M. Bertozzi<sup>5,6,7</sup>, and Lee Worden<sup>1</sup>

<sup>1</sup>University of California San Francisco, Francis I. Proctor Foundation, San Francisco, California, USA

<sup>2</sup>CDC MInD Healthcare Program

<sup>3</sup>University of California San Francisco, Department of Medicine, San Francisco, California, USA

<sup>4</sup>University of California Los Angeles, Department of Ecology and Evolutionary Biology, Los Angeles, California, USA

<sup>5</sup>University of California, Berkeley, California, USA

<sup>6</sup>University of Washington, Seattle, Washington, USA

<sup>7</sup>National Institute of Public Health, Mexico, Cuernavaca, Mexico

\*corresponding author: Seth.Blumberg@ucsf.edu

## ABSTRACT

While many transmission models have been developed for community spread of respiratory pathogens, less attention has been given to modeling the interdependence of disease introduction and spread seen in congregate settings, such as prisons or nursing homes. As demonstrated by the explosive outbreaks of COVID-19 seen in congregate settings, the need for effective outbreak prevention and mitigation strategies for these settings is critical. Here we consider how interventions that decrease the size of the susceptible populations, such as vaccination or depopulation, impact the expected number of infections due to outbreaks. Introduction of disease into the resident population from the community is modeled as a branching process, while spread between residents is modeled via a compartmental model. Control is modeled as a proportional decrease in both the number of susceptible residents and the reproduction number. We find that vaccination or depopulation can have a greater than linear effect on anticipated infections. For example, assuming a reproduction number of 3.0 for density-dependent COVID-19 transmission, we find that reducing the size of the susceptible population by 20% reduced overall disease burden by 47%. We highlight the California state prison system as an example for how these findings provide a quantitative framework for implementing infection control in congregate settings. Additional applications of our modeling framework include optimizing the distribution of residents into independent residential units, and comparison of preemptive versus reactive vaccination strategies.

## 1 Introduction

The COVID-19 pandemic has highlighted the need to quickly identify and implement strategies for controlling the spread of a novel respiratory pathogen. A particular challenge in congregate settings such as prisons, nursing homes, and crowded workplaces where transmission is amplified<sup>1-6</sup>. The increased risk of transmission in these settings results in a higher potential for an outbreak to cause many infections within a few weeks. In addition, residents of congregate settings often have a higher prevalence of comorbidities that contribute to worse disease outcomes<sup>7,8</sup>. The subsequent surge of hospital admissions can strain healthcare capacity and seed increased transmission within the wider community<sup>9,10</sup>. Outbreaks in prison settings are further complicated by the additional security, training, and contractual resources needed to hospitalize an incarcerated person. One opportunity to reduce the public health risk associated with congregate settings is simply to decrease the number of susceptible individuals. This might occur via vaccination or depopulation<sup>10,11</sup>. Reducing the number of susceptible individuals can both decrease the chance of an outbreak occurring and the size of any outbreaks that occur<sup>12</sup>. To provide a quantitative framework to evaluate the impact of reducing the susceptible population, we describe a model for the probability of an outbreak occurring in a congregate setting within a specified time period, as well as the size of an outbreak that may occur. To illustrate the applicability of our model, we utilize publicly available data from the California Department of Corrections and Rehabilitation (CDCR) for the spread of SARS-CoV-2.

## 2 Methods

### 2.1 Data

COVID-19 data for all 35 California state prisons operated by the CDCR are reported daily in a public data dashboard. Machine readable time series of these daily reports were acquired from the University of California Los Angeles COVID Behind Bars project which gathers and organizes COVID-19 data from carceral institutions across the United States.<sup>13</sup> Time series of incident cases were derived by taking the daily difference of reported cumulative cases. Differences in daily cumulative case counts that resulted in negative incidence estimates were ignored and incidence was estimated from the next reported cumulative case count that did not result in a negative incidence estimate.

### 2.2 Model overview

We structure outbreak dynamics in congregate settings into three stages (Figure 1). First, a case has to be introduced into the congregate setting. This may occur due to direct transfer of an infected case into the congregate population, or from transmission from a staff worker or visitor. We model the primary mode of introduction as being from staff introductions, since this is the hardest type of introduction to repress. Second, an introduction of a case (or a few cases) can either be self-limited or progress to a full outbreak. The probability of an outbreak occurring is impacted by the stochastic nature of disease spread, the reproduction number, and the degree of transmission heterogeneity. The reproduction number,  $R_0$ , is the average number of cases each new case causes when all of their contacts are susceptible to disease. We use the dispersion parameter,  $k$ , to denote the amount of transmission heterogeneity. Third, if an outbreak is established, the overall impact is in proportion to the total number of cases infected. Since the large number of cases overwhelms the stochasticity of transmission, this third stage is deterministic in nature. We employ a deterministic susceptible-exposed-infectious-recovered (SEIR) compartmental model for this stage. Assumptions of the SEIR model include that the duration of natural or acquired immunity is long enough so that re-infections are unlikely within the time frame of a single outbreak.

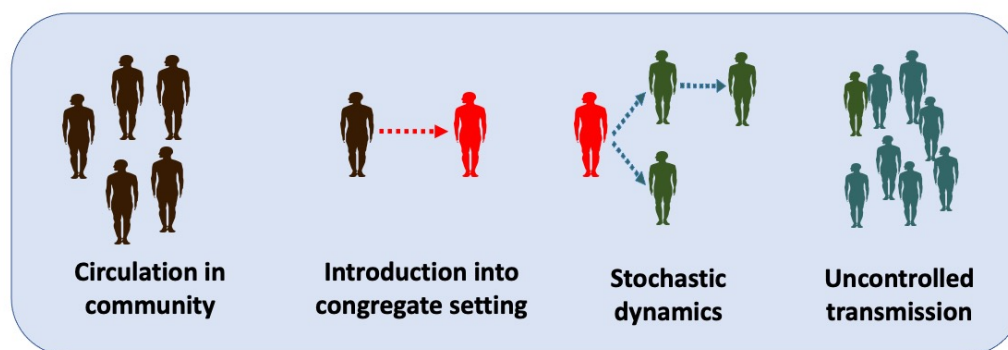

| Probability of introduction                | Probability of outbreak                         | Size/timing of outbreak                     |
|--------------------------------------------|-------------------------------------------------|---------------------------------------------|
| <b>Number of susceptible residents</b>     | <b>Reproduction number</b>                      | <b>Number of susceptible residents</b>      |
| COVID-19 prevalence in staff               | Dispersion parameter                            | <b>Reproduction number</b>                  |
| Number and risk of staff-resident contacts | Cluster size threshold that defines an outbreak | Duration of incubation and infection period |

**Figure 1. Stages of an outbreak.** For an outbreak to occur in a congregate setting, an infection that circulates in the community must be introduced into the congregate setting. Then stochastic dynamics determine whether or not an introduction initiates a large outbreak. Once an outbreak occurs, uncontrolled transmission dictates the size and time course of the outbreak. The table lists the variables that are used in each step of the model. The bolded variables are impacted by a reduction in the number of susceptible individuals, as occurs with vaccination or depopulation.

We assume that  $R_0 > 1$ , because when  $R_0$  is less than one, transmission is self-limited and outbreaks that involve a large portion of the resident population are not expected. The key outputs for the three stages of the model are the rate of introductions,

54  $\phi$ , the probability that an introduction results in uncontrolled transmission,  $P_{uc}$ , and the expected size of any outbreaks that  
55 occur,  $I_{tot}$ . Our models for each stage of an outbreak are described in the supplementary methods.

### 56 2.3 Parameterization

57 The value of the reproduction number is of particular importance for determining the relative impact of control interventions.  
58 For any one disease, there is often great variability of reproduction number estimates. For SARS-CoV-2, there are published  
59 estimates of the reproduction number as high as 8.4 in prison settings.<sup>14</sup> Meanwhile less transmissible diseases can also  
60 cause outbreaks in congregate settings, such as tuberculosis in prisons or influenza in nursing homes.<sup>15–19</sup> Given the range of  
61 estimates for the reproduction number of any single disease, including variants of concern, we explore a range of values for the  
62 reproduction number. For the purpose of our analyses,  $R_0$  is defined within the context of system-wide control interventions  
63 that are in place before consideration of vaccination or depopulation. That is  $R_0$  may incorporate interventions such as masking,  
64 social distancing, ventilation improvements, improved hygiene and other practices that do not specifically reduce the number of  
65 susceptible residents. Based on current literature, we assume a latent period of three days (i.e. time between the occurrence of  
66 infection and the onset of infectiousness), and an infectious period of seven days.<sup>20–24</sup>

67 Our analyses focus mostly on the relative rather than absolute impact of reducing the size of susceptible populations. As  
68 such the specific size of the modeled populations are of secondary importance. However, to provide context for our analyses,  
69 we continue to focus on the spread of SARS-CoV-2 within the California prison system for choosing the remaining parameters.  
70 The average population size of the 35 CDCR prisons was about 3,300 at the beginning of 2020.<sup>25</sup> Meanwhile prisons typically  
71 consist of multiple buildings, that have a degree of independence. Thus, to approximate a single congregate population, we  
72 choose a population size of 1,000 for our analyses. The prevalence of disease in the staff, the average daily number of staff  
73 contacts each resident has, and the probability that an infected staff transmits disease to a resident during a contact were  
74 estimated as 0.01%, 10 and 1% respectively based on a combination of community dynamics and the empirical observation of  
75 relatively frequent outbreaks occurring in the CDCR institutions<sup>13</sup>.

76 Numerous studies have shown that infectious diseases tend to exhibit superspreading behavior characterized by a low  
77 dispersion parameter<sup>26</sup>. Recent studies indicate that SARS-CoV-2 follow this pattern and henceforth we assume a value of 0.2  
78 for the dispersion parameter.<sup>27–29</sup>

### 79 2.4 Impact of decreasing the susceptible population by vaccination or depopulation

80 Each of the stages of our model for outbreak dynamics is influenced by either the number of susceptible individuals,  $R_0$ , or  
81 both. This serves as the basis for assessing how the reduction of the susceptible population by vaccination or depopulation can  
82 impact the burden of disease in congregate settings.

We define  $N_0$ , and  $R_0$  as the size of the congregate population and the reproduction number prior to any control interventions  
that decrease the number of susceptibles, and prior to any outbreak occurring. We let  $\gamma$  represent the amount of ‘control’  
as determined by the proportional reduction in the size of the susceptible population that occurs with vaccination and/or  
depopulation,

$$N = (1 - \gamma)N_0. \quad (1)$$

We assume a linear relationship between the effective reproduction number  $R$ , and  $\gamma$ ,

$$R = (1 - \Theta\gamma)R_0. \quad (2)$$

83 Here we have defined a susceptibility index,  $\Theta$ . For  $\Theta = 0$ , the reproduction number remains constant even when the number  
84 of susceptible residents are reduced. This would be equivalent to a vaccine that eliminates disease but has no impact on  
85 transmission. In the case of depopulation,  $\Theta = 0$  would be consistent with the mean number of contacts per resident remaining  
86 constant even when the population size is reduced. In contrast when  $\Theta = 1$ , the ratio between the size of the susceptible  
87 population and the reproduction number remains constant. This corresponds to a vaccine that is equally effective at reducing  
88 disease and transmission in a well-mixed population. In the case of depopulation  $\Theta = 1$  corresponds to resident contacts  
89 being reduced in proportion to the population size. In disease dynamics literature  $\Theta = 0$  and  $\Theta = 1$  may be referred to as  
90 density-independent and density-dependent transmission respectively. We assume that the dispersion parameter is independent  
91 of  $\gamma$ . Intermediate values of the susceptibility index (ie.  $0 < \Theta < 1$ ) may occur in many ways. Examples include vaccines  
92 that protect against disease more than against infection, or when poor ventilation implies that halving the number of infected  
93 neighbors does not half the risk of acquiring disease.

94 To model the overall impact of depopulation, we define  $E$  to be the average number of cases expected due to outbreaks that  
95 are initiated over a defined time interval,  $T$ . The expected number of introductions is  $\phi T$ . The overall probability,  $P_{ob}$  of an  
96 outbreak occurring is one minus the probability that no introductions lead to uncontrolled transmission. The average number

97 of cases expected due to outbreak dynamics is the overall probability that an outbreak occurs times the expected size of an  
98 outbreak. That is,

$$P_{ob} = 1 - (1 - p_{uc})^{\phi T} \quad (3)$$

$$E = P_{ob} \cdot I_{tot} \quad (4)$$

99 Here we have assumed that only one uncontrolled outbreak can occur in a residential unit because enough individuals would be  
100 infected so that there would be subsequent herd immunity. Each of  $\phi$ ,  $P_{ob}$ , and  $I_{tot}$  depend on  $\gamma$ . The overall impact of control is  
101 probed by evaluating how  $E$  depends on  $\gamma$ .

102 In the supplemental methods, we extend this model to consider two decision-making scenarios. First, we consider how the  
103 average number of infections from outbreaks depends on how a fixed number of susceptible residents are distributed into two  
104 independent residential units. Second, in contrast to the preemptive strategy of decreasing the susceptible population before an  
105 outbreak occurs, we consider how the average number of infection from outbreaks is impacted by a reactive control strategy in  
106 which the susceptible population is rapidly reduced once an outbreak is known to occur.

107 All calculations and simulations are conducted in R, version 4.0.2. Code is available on github (<https://github.com/proctor-ucsf/Transmission-in-congregate-settings>).

## 109 3 Results

### 110 3.1 Evaluating model assumptions

111 From the beginning of CDCR reporting in April of 2020 through February 2, 2021 there were over 41,000 SARS-CoV2 cases  
112 in California State prisons. Within each institution, periods of low disease prevalence were interrupted by focal outbreaks  
113 caused by rapid spread (Figure 2). Some institutions have multiple outbreaks, which is consistent with separate residential  
114 buildings on a campus having outbreaks at different times. Meanwhile there are many examples of small clusters of cases that  
115 do not progress to an outbreak. Upon aggregating case counts by institution and then assigning clusters of infection based on  
116 having at least fourteen days of no cases between clusters, we find that 23% of clusters consist of an isolated case and 53% of  
117 clusters have greater than ten cases suggestive of a large outbreak. Overall this data supports our key assumptions that outbreak  
118 dynamics are supported by sporadic introductions into the residential community and that stochastic dynamics determine the  
119 probability that a sporadic introduction progresses into an uncontrolled outbreak.

### 120 3.2 Stages of outbreak dynamics

121 A prerequisite for an outbreak to occur is introduction of disease into the residential community. For our model, the frequency  
122 of introductions increases with a larger residential population, increased prevalence of disease in the community, a higher  
123 resident-staff contact rate, or higher probability that a resident contact with an infected staff causes disease (Figure S1).

124 A disease introduction may or may not lead to an outbreak. The probability of an outbreak increases as the number of  
125 introductions, or the reproduction number increases (Figure S2). This probability also depends on the dispersion parameter.  
126 High values of the dispersion parameter correspond to homogeneous transmission and more predictable dynamics, whereas  
127 low values correspond to heterogeneous dynamics that are more likely to produce either explosive outbreaks or dead-ends to  
128 transmission. Thus high values of the dispersion parameter lead to a higher outbreak probability (Figure S2).

129 Once an outbreak occurs, the number of infectious individuals in our model grows exponentially until there is a significant  
130 depletion of susceptible individuals (Figure S3). A reproduction number above one is necessary for an outbreak to occur, but  
131 even values moderately above one lead to a large attack rate (i.e. proportion of infected residents). A reproduction number as  
132 low as 1.5 results in an attack rate of 59%, and a reproduction number of 2.5 leads to an attack rate of 89% (as seen by the  
133 asymptotic value for the number of removed individuals in the two panels of Figure S3).

134 An interactive tool for exploring the relationship between input variables and model outputs for each of the three stages of  
135 an outbreak is available at <https://phoebelu.shinyapps.io/DepopulationModels/>.

### 136 3.3 Impact of preemptive control by vaccination or depopulation

137 When our models of disease introduction, outbreak probability and outbreak size are combined, there is a significant impact of  
138 interventions that decrease the size of the susceptible population (Figure 3). Given that there is likely substantial variability in  
139 the value of the reproduction number within different congregate settings, it is notable that control interventions have a large  
140 impact for a wide array of  $R_0$  values. For example, when the susceptible population is decreased by 20% and transmission  
141 decreases linearly with control (i.e.  $\gamma = 0.2$ , and  $\Theta = 1$ ), the expected number of total infections decreases by 73%, 47%, 40%,  
142 and 38%, for  $R_0$  of 1.5, 3.0, 5.0, and 8.0 respectively (Bottom panel of Figure 3). These relative proportions hold for a broad  
143 range of values for other model parameters (data not shown).

144 Notably, the reduction in the number of cases as a function of control occurs in greater than linear fashion (seen by colored  
145 lines falling below the black line in Figure 3). The decrease is even more significant if control impacts both the susceptibility to

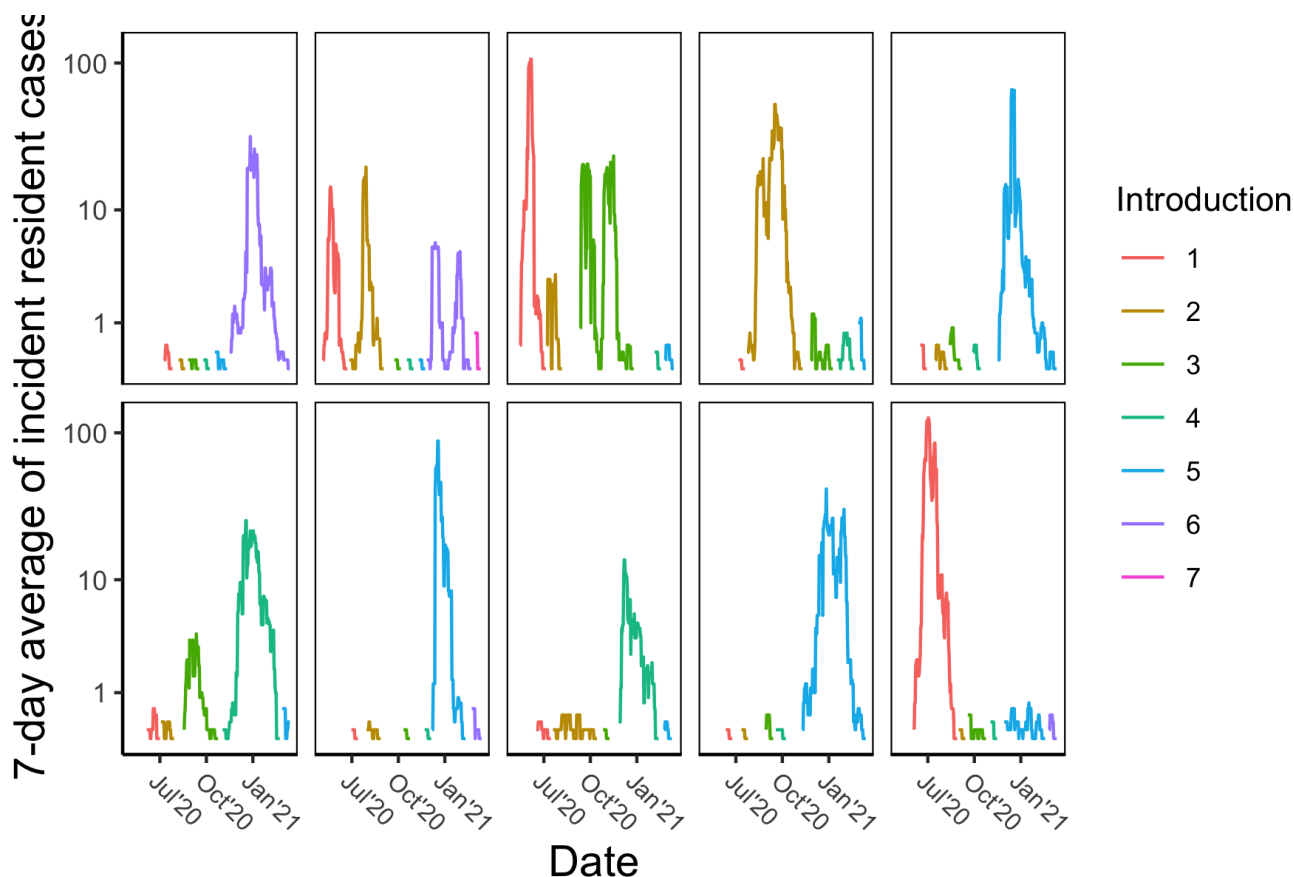

**Figure 2. COVID-19 incidence in California State prisons.** Each panel represents one state institution. For visualization purposes, Y axes are log transformed and 7-day rolling averages of incident counts are displayed. To highlight the stochastic impact of disease introductions, a new color is used for the incidence data whenever there is a period of no cases lasting at least 14 days. Thus the different colors approximate the consequence of individual disease introductions into the residential community. The panels represent all institutions where at least five introductions have occurred. Names of state prisons have been removed, but are available by request.

146 infection and the transmission potential of individuals, as compared to control affecting susceptibility alone (seen by solid lines  
 147 falling below the dashed lines in Figure 3). The greater than linear impact of control can be explained by how the expected  
 148 number of infections is the product of the probability of an introduction, the probability that an introduction leads to an outbreak  
 149 and the size of an outbreak. All of these factors depends on either the effective reproduction number, the size of the susceptible  
 150 population, or both. Since control decreases the size of the susceptible population and possibly the effective reproduction  
 151 number as well, each stage of outbreak dynamics can contribute to the reduction in the number of cases when control is applied  
 152 (Figures 1 and S4). When the dependency of these individual components of outbreak dynamics are multiplied together, the  
 153 result is a greater than linear impact of control. The extreme values of the susceptibility index considered here (i.e.  $\Theta = 0$  and  
 154  $\Theta = 1$ ) provide bounds for the expected dynamics of intermediate values.

155 If control reduces the reproduction number linearly (i.e.  $\Theta = 1$ ), our model predicts several changes in the dynamics of  
 156 outbreaks as control is applied (Figure S5). Notably, the attack rate amongst susceptible individuals decreases as the effective  
 157 reproduction number,  $R$ , decreases (Figure S5, upper right panel), particularly as  $R_0$  approaches one. This implies that for  
 158 relatively small  $R_0$ , the decrease in the size of the outbreak seen with control is largely driven by the attack rate rapidly  
 159 approaching zero, rather than the size of the susceptible population itself. However with higher values of  $R_0$ , most of the  
 160 decrease in the size of the outbreak is driven by a decrease in the number of susceptible residents rather than by a reduction in  
 161 the attack rate. Reducing the size of the susceptible population also delays the timing of the peak for the number of infectious  
 162 individuals and reduces the maximum number of individuals infected at once (Figure S5, bottom panels). This can help facilitate  
 163 roll-out of public health interventions that can further decrease the burden of disease. It also helps to minimize overcrowding of  
 164 healthcare facilities used to treat severe cases. If control has no impact on the reproduction number (i.e.  $\Theta = 0$ ), our model



165 predicts that the control has no impact on the attack rate or temporal dynamics of uncontrolled outbreaks.

### 166 **3.4 Adjunctive strategies for disease control**

167 In some circumstances, it may be possible to reduce the risk and burden of disease outbreaks by optimizing the way a group  
168 of residents are proportioned into distinct residential units, such as two independent buildings (Supplementary text S7.2.1).  
169 For most reasonable parameter values, it appears optimal to distribute residents in a manner that keeps  $R$  consistent across the  
170 population.

171 In other circumstances there may be an opportunity to implement reactive disease control measures in which the number  
172 of susceptible individuals is rapidly reduced once an outbreak has been detected to occur (Supplementary text S7.2.2). This  
173 contrasts with the preemptive approach discussed above of reducing the susceptible population before an outbreak has even  
174 occurred. When the efficacy of a reactive control is compared to preemptive control, it appears that reactive control is more likely  
175 to be effective when the reproduction number is lower, there is minimal delay in implementing control and the individual-level  
176 efficacy of reactive control is high.

## 177 **4 Discussion**

178 The burden of COVID-19 within prisons, nursing homes and other congregate settings has provided a devastating reminder of  
179 the fragility of congregate settings. To reduce unnecessary death, disease, and economic loss, policies are needed to prevent  
180 outbreaks from occurring and to mitigate outbreaks that have already started. Besides protecting the residents of congregate  
181 settings, interventions that reduce outbreak potential also reduce strain on local health systems and spillover infections in  
182 the community. An additional consideration is the strain on staff during outbreaks due to their own health risk, often being  
183 overworked, and the emotional burden of taking care of vulnerable populations. Thus the longer term implications of reducing  
184 outbreak potential include decreasing the risk of staff burnout, post-traumatic stress disorder, and loss of institutional trust.

185 Our model for the impact of control on outbreak dynamics can be integrated into a variety of infection control policy  
186 decisions. For example, in the context of the COVID-19 pandemic, our study of the impact of decreasing the susceptible  
187 population could have provided quantitative context to decisions about how much to prioritize decarceration of prison  
188 populations, or whether additional nursing homes for COVID-19 patients are needed to ensure that existing ones are not  
189 overburdened with transmission. In particular, we found that relatively small reductions in the susceptible population of  
190 congregate settings could have a significant impact on the overall number of cases due to outbreaks. This multiplicative effect  
191 occurs due to a combination of decreasing the rate of disease introductions, the probability that an introduction leads to an  
192 outbreak and the size of any outbreak that occurs (Figure 1). Consideration of how populations can be divided into distinct  
193 residential units as well as the possibility of reactive interventions once an outbreak begins provides further opportunities for  
194 disease control.

195 In order to frame our analysis of control strategies in a manner that was intuitive and transparent, we made many assumptions.  
196 Depending on specific circumstances of spread in congregate settings, some assumptions will be more relevant than others.  
197 Specifically we ignore the possibility of direct transfer of infected individuals from one building to another as can inadvertently  
198 happen for individuals who are transferred during the latent period. We ignore the fluctuation of disease prevalence in the  
199 staff, particularly as surges may occur due to staff-staff transmission, resident-to-staff transmission, or increases in community  
200 transmission. Similarly we ignore how staff-resident contacts may evolve over the course of a pandemic, particularly as access  
201 to personal protective equipment and education about infection control improves over time. Our use of a SEIR transmission  
202 model assumes that within a residential unit (e.g. an isolated building) everyone is in equal contact with each other and  
203 thus ignores the finer scale structure of population dynamics. Our SEIR model also incorporates the standard assumptions  
204 of compartmental models including constant exponential rates of transitions and standard mass-action transmission. These  
205 assumptions ignore the possibility of seasonal effects, such as the possibility that transmission is impacted by changes in air  
206 circulation when heating or air conditioning is utilized. Except for our modification for reactive vaccination, The SEIR model  
207 also ignores how a large outbreak would likely inspire multiple efforts to acutely mitigate disease transmission. Finally, our  
208 assumption of a linear, density-dependent relationship between the size of the susceptible population and the reproduction  
209 number ignores how factors such as the relationship between duration-of-exposure and infection status may yield a non-linear  
210 relationship.

211 Our model can be adjusted to accommodate more flexible assumptions, but this would come at the cost of adding extra  
212 parameters whose values may not be readily identifiable. Importantly, the key finding that decreasing the number of susceptible  
213 individuals in congregate settings can have a greater than linear impact on disease burden is expected to be robust to many  
214 variants of our model. It is also important to place interventions that reduce the susceptible population into a large context  
215 of intervention strategies. Many scenarios may benefit from other control interventions such as improved ventilation, more  
216 frequent testing, greater adherence to social distancing, improved utilization of personal protective equipment, or cohorting  
217 of staff by residential unit. In addition, besides absolute case counts there are other important considerations for describing

218 the impact of outbreaks on residents of congregate settings including contributions to health inequity, mental health toll, and  
219 reduction of ancillary services that are deprioritized during pandemic emergencies. Specific policy-making decisions also need  
220 to consider how control strategies will impact the ability of staff to fulfill their normal professional responsibilities, as well as  
221 protect their own health.

## 222 **5 Conclusion**

223 Congregate settings pose a risk of large disease outbreaks. To reduce the burden that outbreaks have on residents, staff and the  
224 community at large, it is important to optimize strategies for preventing and mitigating outbreaks. We find that preemptive  
225 reduction of the size of the susceptible population via depopulation or vaccination can have a greater than linear affect on  
226 outcomes.

## 227 **6 Funding**

228 SB, CMH, and PL were supported by CDC U01CK000590, as part of the Modeling Infectious Diseases in Healthcare Network.  
229 LW was supported by NIH R01GM130900. SMB, ATK, DS, LW receive funding from the Officer of the Federal Receiver  
230 which oversees the delivery of healthcare services in California's state prison system. All authors retained full independence in  
231 data analysis and in the interpretation of the results.

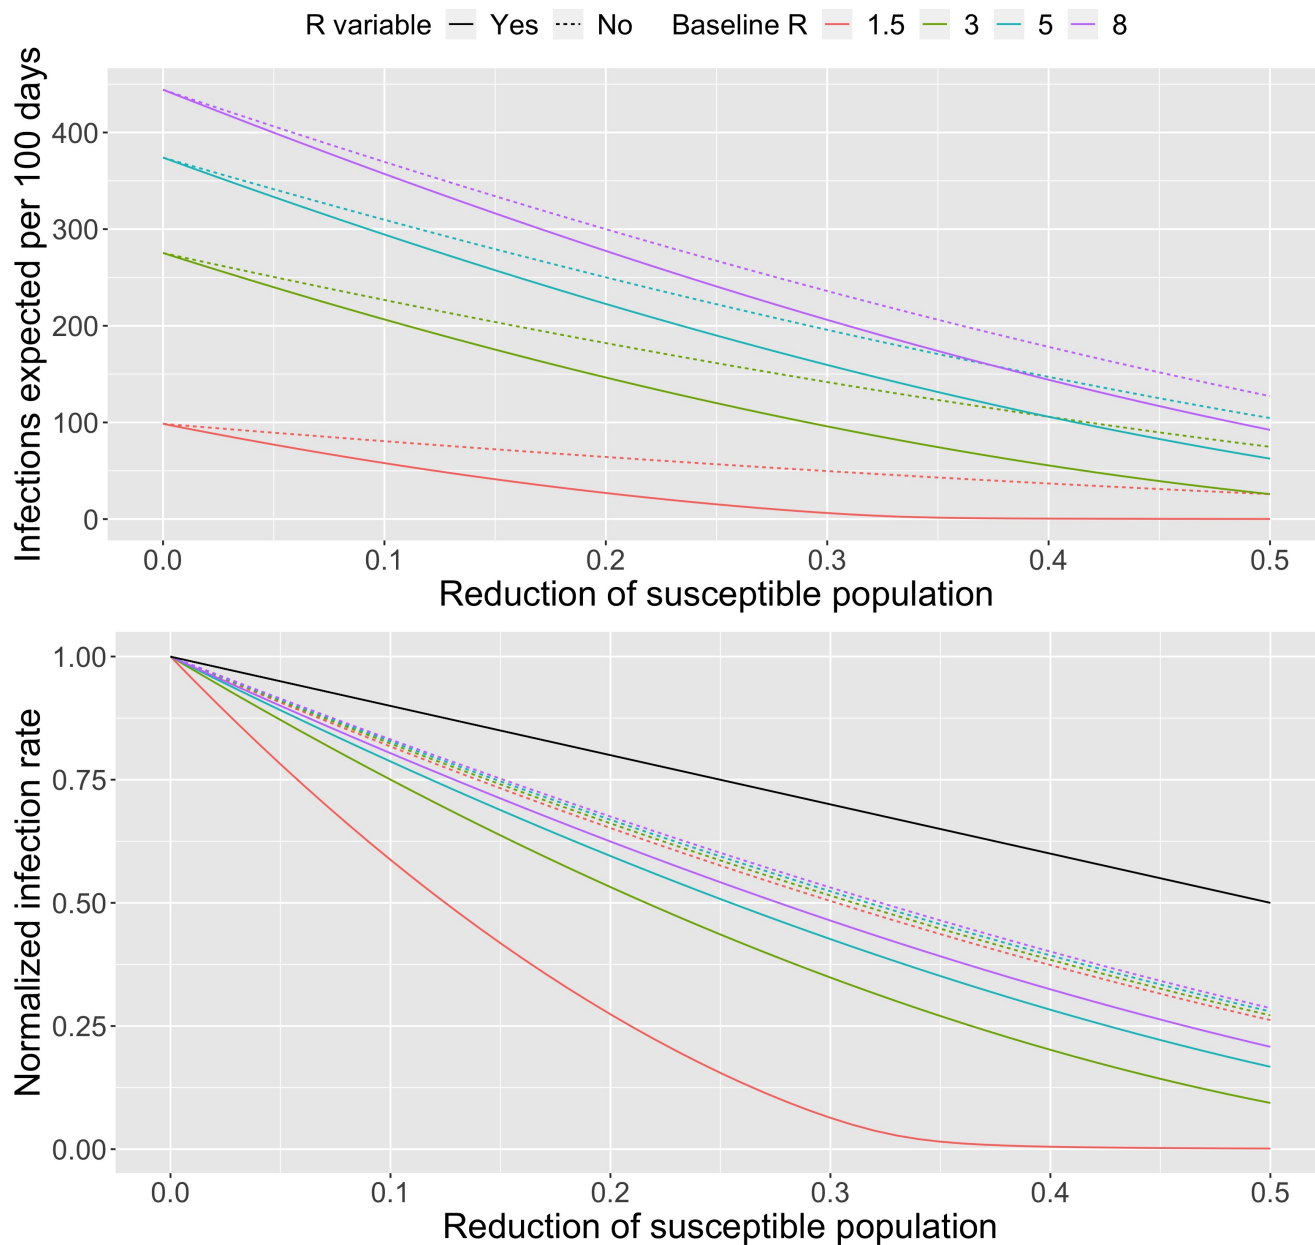

**Figure 3. Impact of control measures that decrease the size of the susceptible population.** (Top) The expected number of infections due to outbreaks occurring within 100 days as a function of the level of control. The control value,  $\gamma$ , shown on the x-axis is the proportion of the number of susceptible individuals that are removed from the resident population via vaccination and/or depopulation. Colors correspond to different values of the baseline reproduction number,  $R_0$ , for when no control is implemented. Specific values of the  $R_0$  are specified by the legend. Dashed lines show the result assuming that the control intervention does not change the reproduction number (e.g.  $\Theta = 0$  corresponding to a vaccine that immunizes against disease, but not asymptomatic infection). Solid lines show results assuming that the reproduction number changes in proportion to the level of control (e.g.  $\Theta = 1$  corresponding to a vaccine that immunizes against disease and asymptomatic infection). (Bottom) Analogous to top panel, except that the rate of infection has been normalized to a rate of one when the level of control is zero. This highlights the relative impact of decreasing the number of susceptible individuals. For both panels superspreading is allowed, which is modeled by a dispersion value of 0.2. We set  $N_C = 10$  and  $\alpha_{ic} = 0.01$ , meaning that residents are assumed to have 10 contacts with staff a day and that contact with an infected staff has a one percent chance of transmitting infection. The other parameters are the same as the defaults for Figures S1 – S3.



## 232 7 Supplement

### 233 7.1 Supplement text: Methods

#### 234 7.1.1 Probability of introduction

235 We model introduction of disease into the resident community as primarily coming from contact with infected staff. The daily  
 236 rate of introducing a case,  $\phi$ , is the product of the average number of staff-resident contacts per day and the probability that a  
 237 staff-resident contact causes transmission. The average number of staff-resident contacts per day is the product of the number  
 238 of susceptible individuals in the resident community,  $N_s$ , and the average number of contacts residents have with staff,  $N_c$ . Note  
 239 that we define a contact to be a pairing of a resident and staff member. If there are multiple interactions of that pairing through  
 240 a day, we still count it as one contact. We also ignore staff contacts with residents who are not susceptible as these will not  
 241 result in disease introductions. The probability that a staff-resident contact causes transmission is the product of the prevalence  
 242 of disease in the staff,  $P_{com}$ , and the probability that an infectious contact causes an infection  $\alpha_{ic}$ . Thus,

$$\phi = N_s \cdot N_c \cdot P_{com} \cdot \alpha_{ic}. \quad (5)$$

243 The average number of days until an introduction occurs is the reciprocal of  $\phi$ . If there is significant concern for introduction  
 244 from visitors, then this can be accommodated by defining  $N_c$  as the sum of average daily contacts a resident has with both staff  
 245 and visitors. The various components of Equation 5 are likely to change over time. For the purposes of evaluating the impact of  
 246 interventions that decrease the size of the susceptible population, we consider  $\phi$  to be an average daily rate of introducing a  
 247 case.

#### 248 7.1.2 Probability of an introduction going extinct

249 When the number of residents with infection is a low number, the stochasticity of transmission can lead to significantly different  
 250 outcomes. In some cases, introduction of disease may lead to no additional infections or a limited number of infections. In  
 251 other cases, introduction of disease may lead to enough cases such that an outbreak is inevitable. We refer to the probability  
 252 that an outbreak occurs as the probability of uncontrolled transmission,  $p_{uc}$ .

253 To model the probability that introduction of disease leads to extinction, we assume that the probability distribution for  
 254 the number of secondary infections caused by each new infection follows a negative binomial distribution.<sup>26</sup> The negative  
 255 binomial distribution is described by the reproduction number,  $R$ , and the dispersion parameter,  $k$ . The reproduction number is  
 256 the average number of cases each new infection causes, but differs from  $R_0$  in that it incorporates possible reduction of the  
 257 susceptible population due to vaccination or depopulation. The dispersion parameter characterizes the degree of transmission  
 258 heterogeneity. Low values of  $k$  are seen when superspreading occurs, meaning that a relatively few number of cases causes a  
 259 large proportion of the cases.

With these assumptions, there is an analytic relationship between  $R$ ,  $k$ , the number of disease introductions occurring  
 concurrently,  $\zeta$ , and the probability,  $q_s(\zeta)$ , of having an infection cluster of size of  $s$ .<sup>30,31</sup> The probability,  $r_{i,j}$ , that  $i$  infections  
 causes  $j$  infections is,

$$r_{i \rightarrow j} = \frac{\Gamma(j+k \cdot i)}{\Gamma(j+1) \cdot \Gamma(k \cdot i)} \cdot \left(\frac{k}{R+k}\right)^{k \cdot i} \cdot \left(\frac{R}{R+k}\right)^j, \quad (6)$$

where  $\Gamma$  is the Gamma function. Then,

$$q_s(\zeta) = \frac{\zeta}{s} \cdot r_{s \rightarrow (s-\zeta)}. \quad (7)$$

The use of a stationary negative binomial offspring distribution assumes that depletion of susceptibles is not a significant  
 factor in transmission dynamics. This is a reasonable assumption if the number of infections that follow one or more  
 introductions is small. However, once there are a significant number of infections following one or more introductions, a  
 different transmission model is needed that accounts for depletion of susceptibles when there is uncontrolled transmission. We  
 classify those instances in which there are more than  $C_{th}$  cases as uncontrolled transmission. All clusters of infection arising  
 from an introduction that have less than  $C_{th}$  cases are considered extinction events. Thus the probability of  $\zeta$  concurrent disease  
 introductions leading to uncontrolled transmission is,

$$p_{uc} = 1 - \sum_{s=\zeta}^{C_{th}} q_s(\zeta). \quad (8)$$

### 260 7.1.3 Size and temporal dynamics of an outbreak

261 Once an outbreak is established, we use a deterministic compartmental model to describe the transmission dynamics. In this  
 262 model, the rate that the susceptible residents become infected is proportional to the product of the number of susceptible and  
 263 infectious residents. Once infected, a resident will be classified as exposed, but not infectious. The rate that exposed residents  
 264 transition into being infectious is constant. Infectious residents are removed from the population at a constant rate. Removal  
 265 may occur due to recovery, transport to a higher level of care or death. Once residents are removed, they are considered  
 266 non-infectious and are no longer susceptible. During the course of an outbreak, it is assumed that no new susceptible residents  
 267 are introduced into the population. The equations describing the model are,

$$\frac{dS}{dt} = -\frac{S}{N} \cdot \frac{R \cdot I}{T_I} \quad (9)$$

$$\frac{dE}{dt} = \frac{S}{N} \cdot \frac{R \cdot I}{T_I} - \frac{E}{T_E} \quad (10)$$

$$\frac{dI}{dt} = \frac{E}{T_E} - \frac{I}{T_I} \quad (11)$$

$$\frac{dX}{dt} = \frac{I}{T_I} \quad (12)$$

268 where  $S$ ,  $E$ ,  $I$ , and  $X$  represent the number of susceptible, exposed, infectious, and removed residents. The average time for  
 269 being in the exposed and infectious states is represented by  $T_E$  and  $T_I$  respectively.

270 To determine the total number of residents infected,  $I_{tot}$ , the proportion of residents who become infected,  $P_T$ , the maximum  
 271 number of residents infected at once,  $M_T$ , and the time of peak incidence,  $T_M$ , we simulate the preceding model numerically.  
 272 Then,

$$I_{tot} = X(t \rightarrow \infty) \quad (13)$$

$$P_T = \frac{I_{tot}}{N} \quad (14)$$

$$M_T = \max_{t \in (-, \infty)} I(t) \quad (15)$$

$$T_M = I(t = M_T). \quad (16)$$

273  $P_T$  is also known as the attack rate

274 For the simple compartmental model we are utilizing, other methods are available for determining the attack rate, such as  
 275 transcendental equation relationships for the final size of epidemics.<sup>32</sup> The benefit of utilizing a computational approach is  
 276 that it offers a more flexible framework for making modifications to the model such as might occur if there were different risk  
 277 classes or other forms of population structure.

### 278 7.1.4 Optimizing distribution of residents

279 When considering the optimal proportion of residents to house in each of two independent residential units, we specify the  
 280 baseline occupancy of each residential unit,  $N_0^1$  and  $N_0^2$ , as well as the basic reproduction numbers at those baseline occupancies  
 281 assuming all residents are susceptible,  $R_0^1$  and  $R_0^2$ . We also specify the fraction of population that are immune due to vaccination  
 282 or prior infection,  $V$ . For a proportion  $\sigma$  of residents assigned to residential unit one, we set the size of the susceptible pool and  
 283 the effective reproduction numbers prior to any outbreaks as,

$$N_E^1 = \sigma \cdot (N_0^1 + N_0^2) \quad (17)$$

$$N_E^2 = (1 - \sigma) \cdot (N_0^1 + N_0^2) \quad (18)$$

$$R_E^1 = R_0^1 \cdot \frac{N_E^1 \cdot (1 - V)}{N_0^1} \quad (19)$$

$$R_E^2 = R_0^2 \cdot \frac{N_E^2 \cdot (1 - V)}{N_0^2} \quad (20)$$

284 Except for these parameterizations, the model is run for each residential unit independently to determine the outbreak  
 285 probabilities for each unit,  $P_{ob}^1$  and  $P_{ob}^2$ , and expected outbreak sizes,  $I_{tot}^1$  and  $I_{tot}^2$ . The joint probability of an outbreak occurring

286 in at least one residential unit and the overall expected number of cases due to outbreak dynamics is then,

$$P_{ob}^{all} = P_{ob}^1 + P_{ob}^2 - P_{ob}^1 \cdot P_{ob}^2 \quad (21)$$

$$I_{tot}^{all} = P_{ob}^1 \cdot I_{tot}^1 + P_{ob}^2 \cdot I_{tot}^2 \quad (22)$$

### 287 7.1.5 Reactive control

288 As an alternate to preemptively vaccinating residents before an outbreak occurs, we also consider a reactive approach. In this  
289 scenario, we allow the baseline model to run until a ‘trigger threshold’ is reached for the number of cases and then vaccination  
290 is provided to the residents in the affected unit. The model continues to run unchanged for a time period specified by the control  
291 delay. Then, the susceptible population experiences a one time relative decrease of one minus the reactive vaccine efficacy. The  
292 reactive control efficacy is distinct from the ‘preemptive vaccine efficacy’ denoted by  $V$  (Section 7.1.4). The rest of the model  
293 proceeds as before.

## 294 7.2 Supplement text: Results

### 295 7.2.1 Optimizing distribution of residents

296 Decreasing the size of the susceptible population is not the only way to decrease the probability of an outbreak or the expected  
297 number of cases from an outbreak. These quantities can also be reduced by cohorting residents between two independent  
298 residential units. Independent residential units might be different buildings within a prison, different units in a healthcare  
299 facility, or other housing paradigms that exclude mixing of residents from different units. The optimal distribution of susceptible  
300 residents between two separate residential units depends on the relative transmissibility in each unit, and the overall number  
301 of susceptible residents (Figure S6).<sup>33</sup> As described in the supplemental methods, the transmissibility is characterized by the  
302 reproduction number corresponding to baseline occupancy by an entirely susceptible population of residents.

303 To minimize the probability that an outbreak occurs, the optimal distribution of susceptible residents is the one that equalizes  
304 the reproduction number between the residential units (Figure S6, top). Thus if the residential units have the same transmission  
305 potential, the outbreak probability is minimized by keeping the residential unit occupancy balanced at 50% each. However in  
306 Scenario 2 where the reproduction number for Unit A and B is 6 and 2 respectively, then the outbreak probability is minimized  
307 when 25% of residents are in residential unit A and 75% are in residential unit B. At this occupancy, the reproduction number  
308 equal in both residential units becomes three (Section 7.1.4).

309 The optimal proportion of residents to house in each residential unit to minimize the expected number of cases from  
310 outbreaks does not follow a simple rule (Figure S6, bottom). For scenarios with moderate values for the probability of an  
311 outbreak occurring, the optimal proportion to house in each residential unit to minimize the expected number of cases is closer  
312 to 50% than what is expected from analyzing the outbreak probability alone. For scenarios with low values of the probability  
313 of an outbreak occurring, the expected number of cases due to outbreaks occurring can remain low for a wide range of the  
314 proportion housed in each residential unit (Scenario 4). This is because the effective reproduction number can be kept below  
315 one across this range and thus outbreaks are not expected to occur. For high risk scenarios where the probability of an outbreak  
316 occurring is close to one, the best opportunity to minimize the number of cases is to reduce the number of residents in one  
317 residential unit to the point that a large outbreak can only occur in the more populous residential unit (Scenario 6). However,  
318 the benefit of the optimal distribution in the high risk scenario is quite marginal. The intricacies of these relationships can be  
319 visualized by considering the outbreak dynamics in each residential unit separately (Figure S7).

### 320 7.2.2 Preemptive versus reactive control

321 When resources are constrained, there can be a trade-off between preemptive and reactive strategies for outbreak control. For  
322 example, suppose there are five equally sized residential units and only enough vaccine for 20% of the total population. As a  
323 preemptive approach, the number of susceptible residents in each residential unit could be reduced by 20%. An alternative  
324 reactive approach would be to monitor for disease introduction and if evidence of within-residence transmission is detected,  
325 then vaccinate all residents in the residential unit as quickly as possible.

326 Visualization of the outcomes for preemptive vs reactive vaccination shows that the benefit of a reactive strategy depends  
327 heavily on the control delay and the effectiveness of vaccination (Figure S8). Reactive control is more likely to be superior to  
328 preemptive control if the reproduction number is low. The higher the reproduction number is, the quicker a reactive strategy  
329 will need to be deployed in order for it to have much impact. Even with a control delay of 30 days our model predicts a reactive  
330 vaccine efficacy of 20% would be superior to preemptive vaccine efficacy of 10% for an  $R_0$  of 1.5 (seen by the red line being  
331 below the dotted line in the left panel of Figure S8). However, if  $R_0$  were 3.5, even rapid implementation of reactive control  
332 with an efficacy of 20% would not yield better results than preemptive control with an efficacy of 10% (seen by the red line  
333 being above the dotted line in the right panel of Figure S8).

334 Our definition of preemptive vaccine efficacy combines the impact of preemptive vaccine coverage and the ability of the  
335 vaccine to prevent transmission. For example, if two third of residents accept the vaccine and the vaccine decreases transmission

336 by 75% then the preemptive vaccine efficacy is 50%. The reactive vaccine efficacy is meant to incorporate a combination  
337 of effects including imperfect vaccination rates, delays in vaccine-induced immunity and breakthrough infections despite  
338 maximum vaccine immunity. One caveat of these results is that we have assumed that there is always enough vaccine available  
339 to implement reactive vaccination. If there are outbreaks in multiple residential units that require a reactive response, then the  
340 reactive vaccine efficacy may decrease substantially due to vaccine shortage.

341 Besides reactive vaccination, it may also be possible to implement a reactive depopulation strategy. However, it would be  
342 important that the residents who are removed from the outbreak are quarantined prior to moving to a new location. Otherwise  
343 reactive depopulation could seed outbreaks in new locations.

## 344 **8 Supplemental Figures**

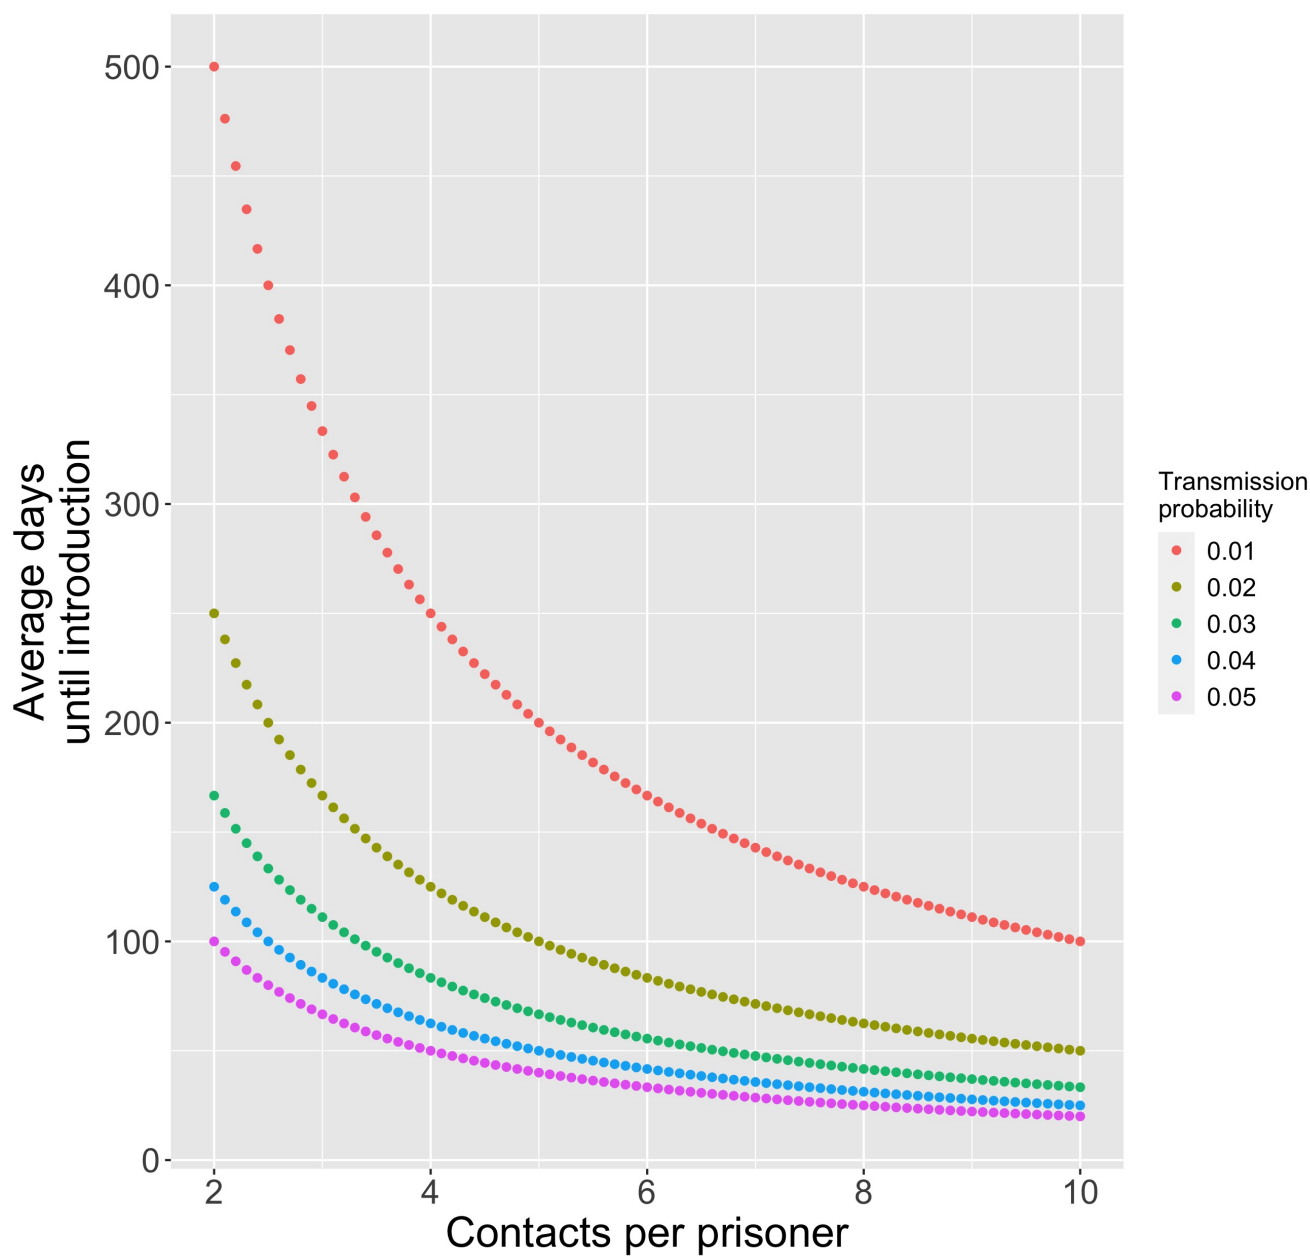

**Figure S1. Frequency of an introduction.** Average number of days until a COVID-19 case is introduced into the resident community,  $\phi$ , as a function of the average number of contacts a resident has with resident staff,  $N_c$ . Colors correspond to different values for  $\alpha_{ic}$ , the probability that a resident's contact with an infected staff causes an infection. The prevalence of disease in the community,  $P_{com}$ , is assumed to be 0.01%. The number of susceptible individuals in the congregate community,  $N_s$ , is assumed to be 1,000.



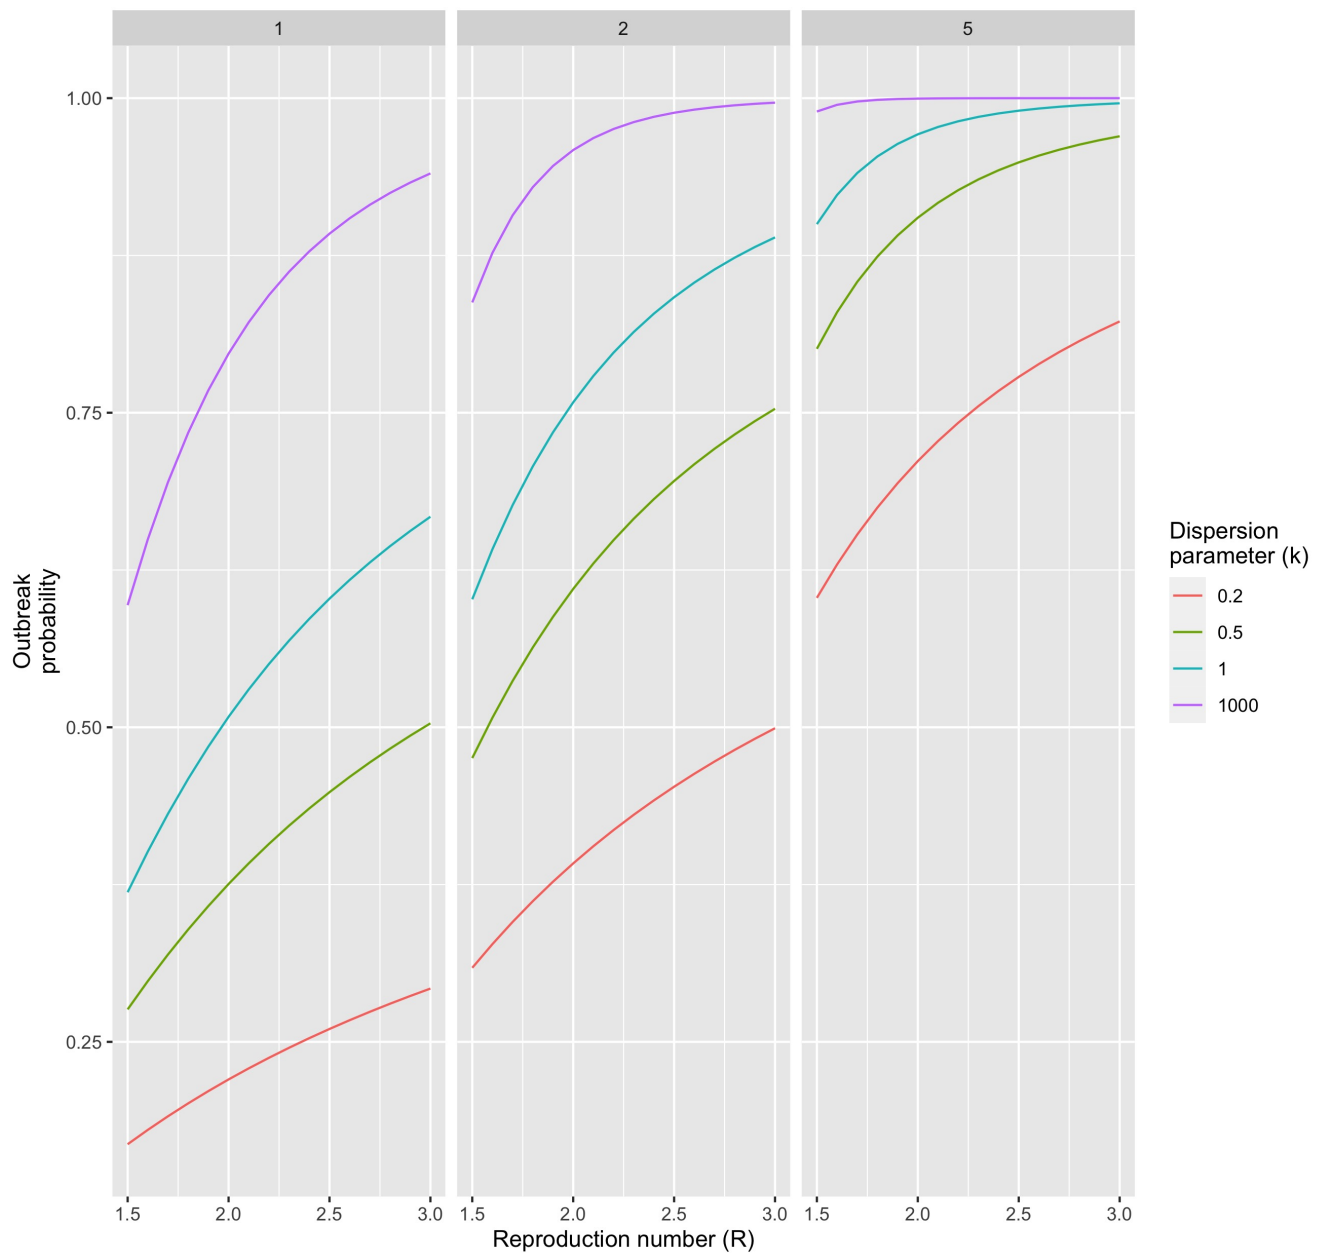

**Figure S2. Probability of an outbreak.** The probability of an outbreak occurring as a function of the reproduction number, which is defined the average number of transmission events each new case causes. The panels correspond to different numbers of simultaneous disease introductions as indicated in the top of the panel. The different colors correspond to different values of the dispersion parameter. Homogeneous transmission corresponds to  $k = \infty$ , and superspreading is more prevalent as  $k$  decreases. Plots are based on  $C_{th} = 10$ , meaning that an outbreak is defined to occur when an introduction leads to at least ten cases.

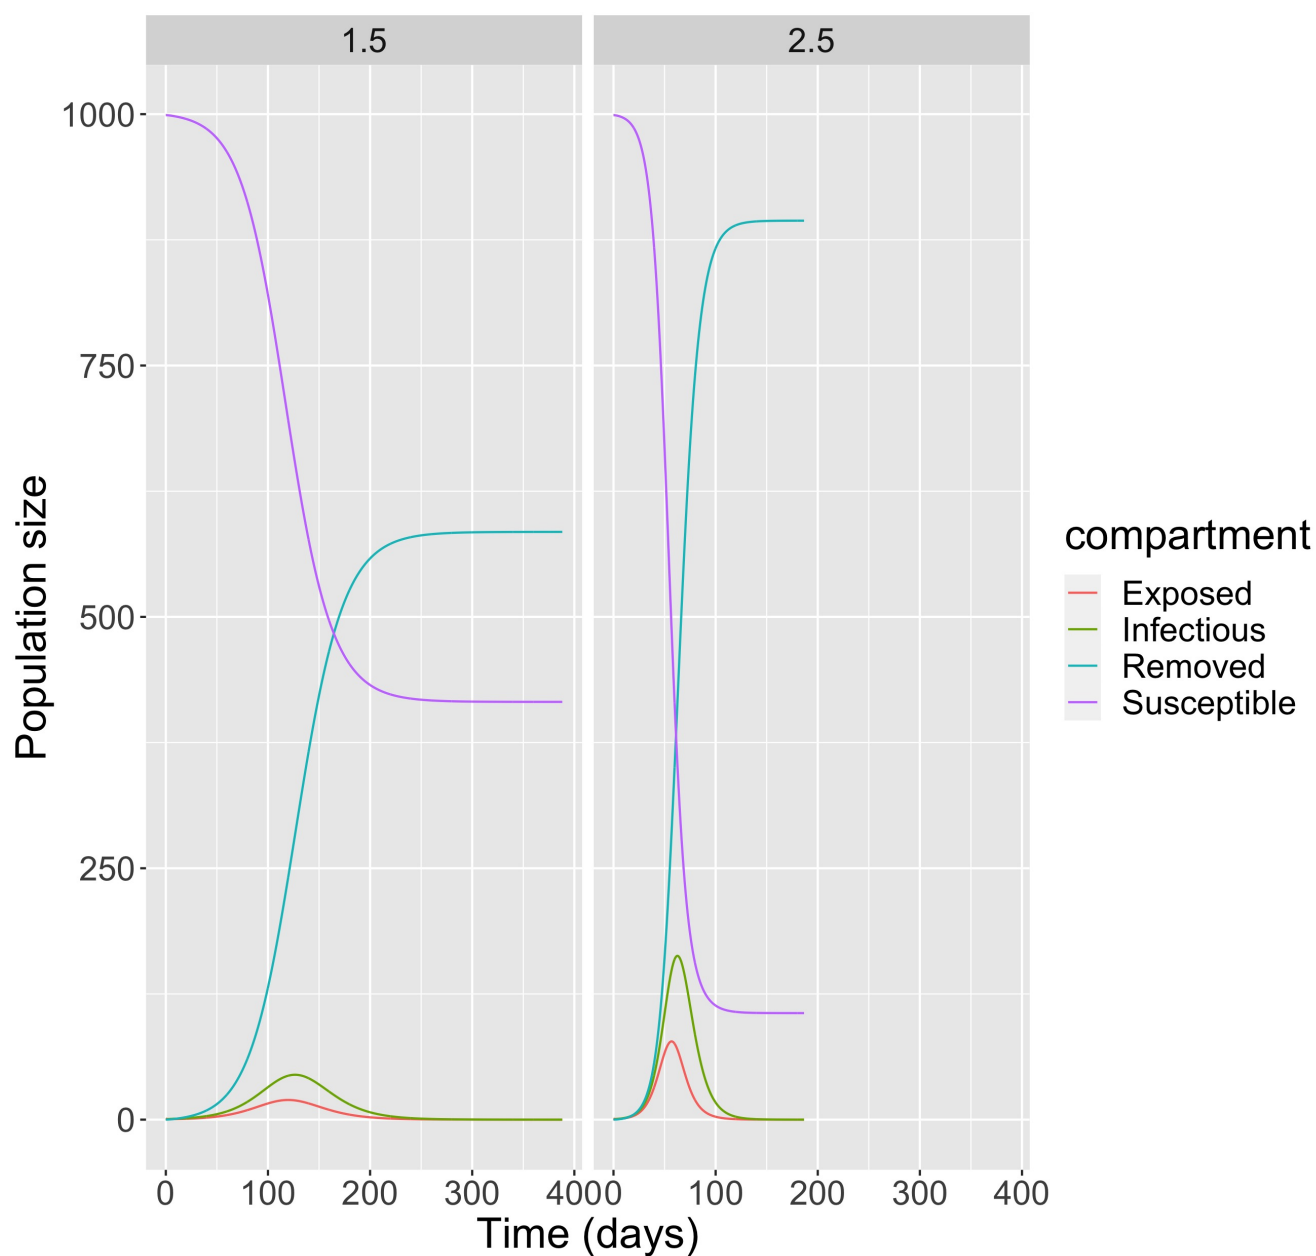

**Figure S3. Transmission dynamics.** The number of susceptible, exposed, infectious and removed residents are shown as a function of time for an outbreak in a congregate setting. The removed category includes those who have recovered from illness, those who are sick but quarantined and those who have died. The two panels represent two different values of  $R$ . A total population of 1,000 is assumed. The average duration of each COVID-19 case being in the latent and infectious periods is 3 and 7 days respectively. The depicted outbreaks start with one exposed individual at time 0. The time step used for running the transmission dynamics model is 0.2 days, and the model is run until a negligible number of infectious individuals remain.

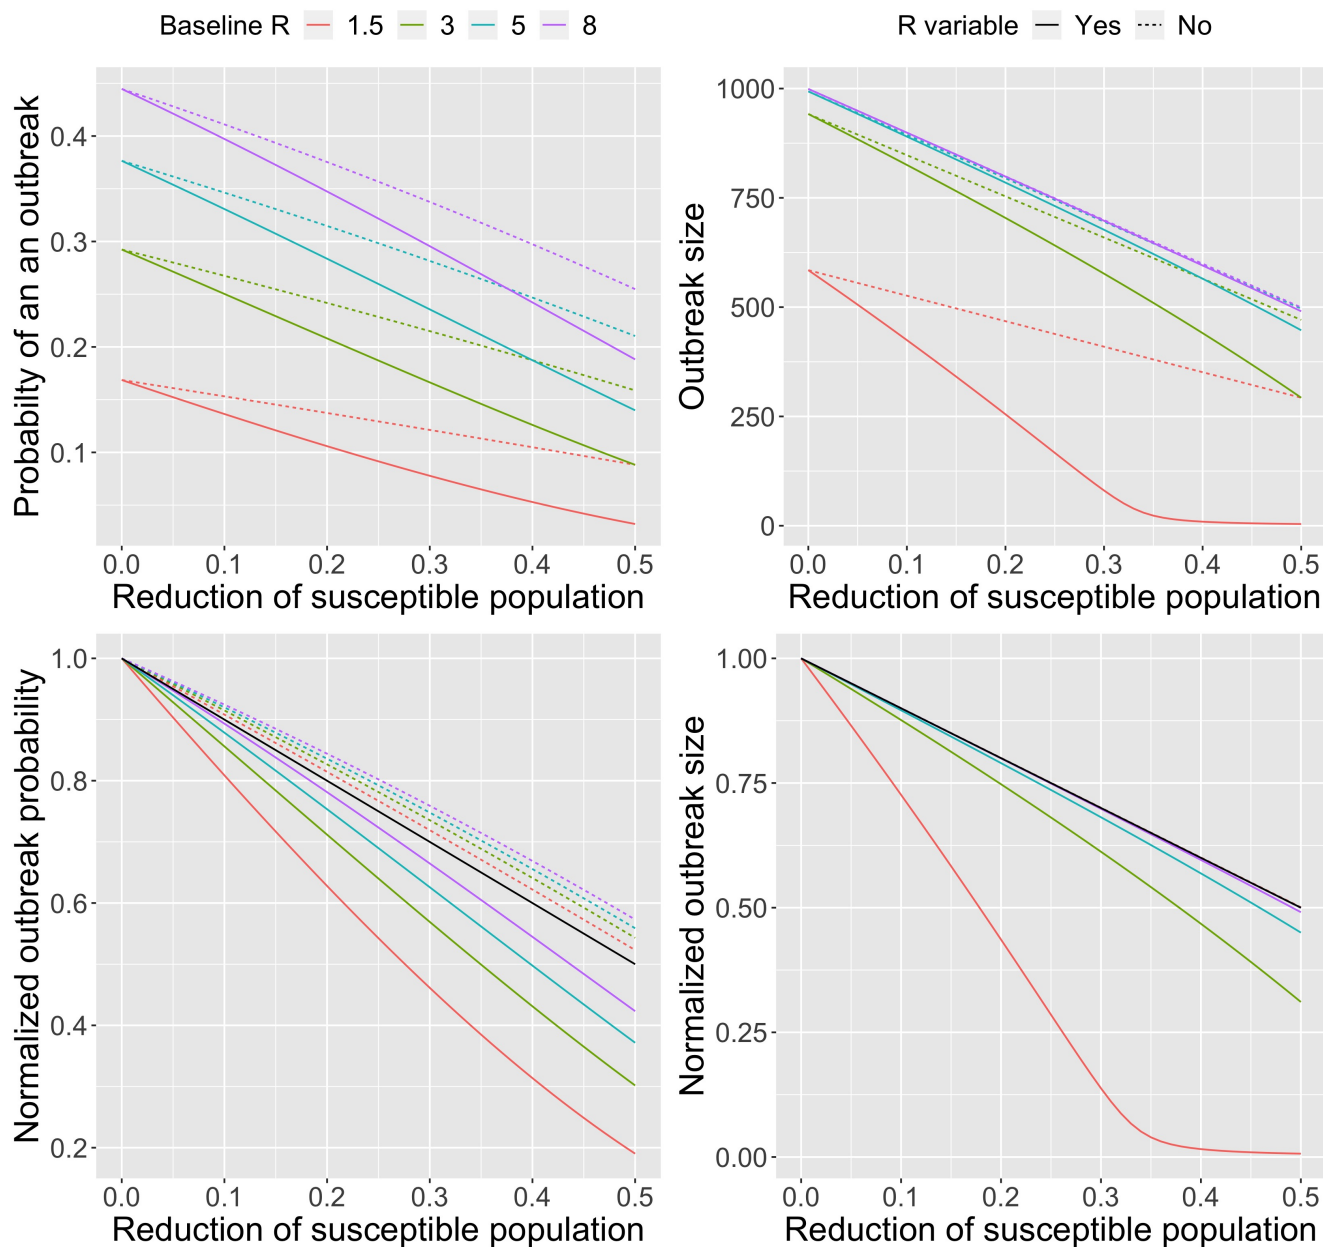

**Figure S4. Probability and size of an outbreak** Probability of an outbreak occurring in 100 days (left panels) and size of outbreaks (right panels) as a function of control. The level of control is defined as the proportion of the susceptible population reduced by processes such as vaccination or depopulation. As parameterized by the legend, colors correspond to different values of the baseline reproduction number that represents transmission when there is no control. Dashed colored lines represent the modeling assumption that the reproduction number is unaffected by control (i.e.  $\Theta = 0$ ). Solid colored lines represent the modeling assumption that the reproduction number varies in direct proportion to the fraction of the population that remains susceptible (i.e.  $\Theta = 1$ ). Top panels show the absolute values, while the bottom panels show normalized values that are always one when there is no control. The black line in the bottom panel is a visual aid that signifies how the outbreak probability and outbreak size would change if there was a linear relationship with the level of control. Parameter values are as specified in Figure 3. As a technical note, there is a less than linear impact on the probability of an outbreak if control does not affect the reproduction number (dashed lines in lower left panel), because for our chosen parameter values the probability of an outbreak begins to saturate when the level of control is very small.

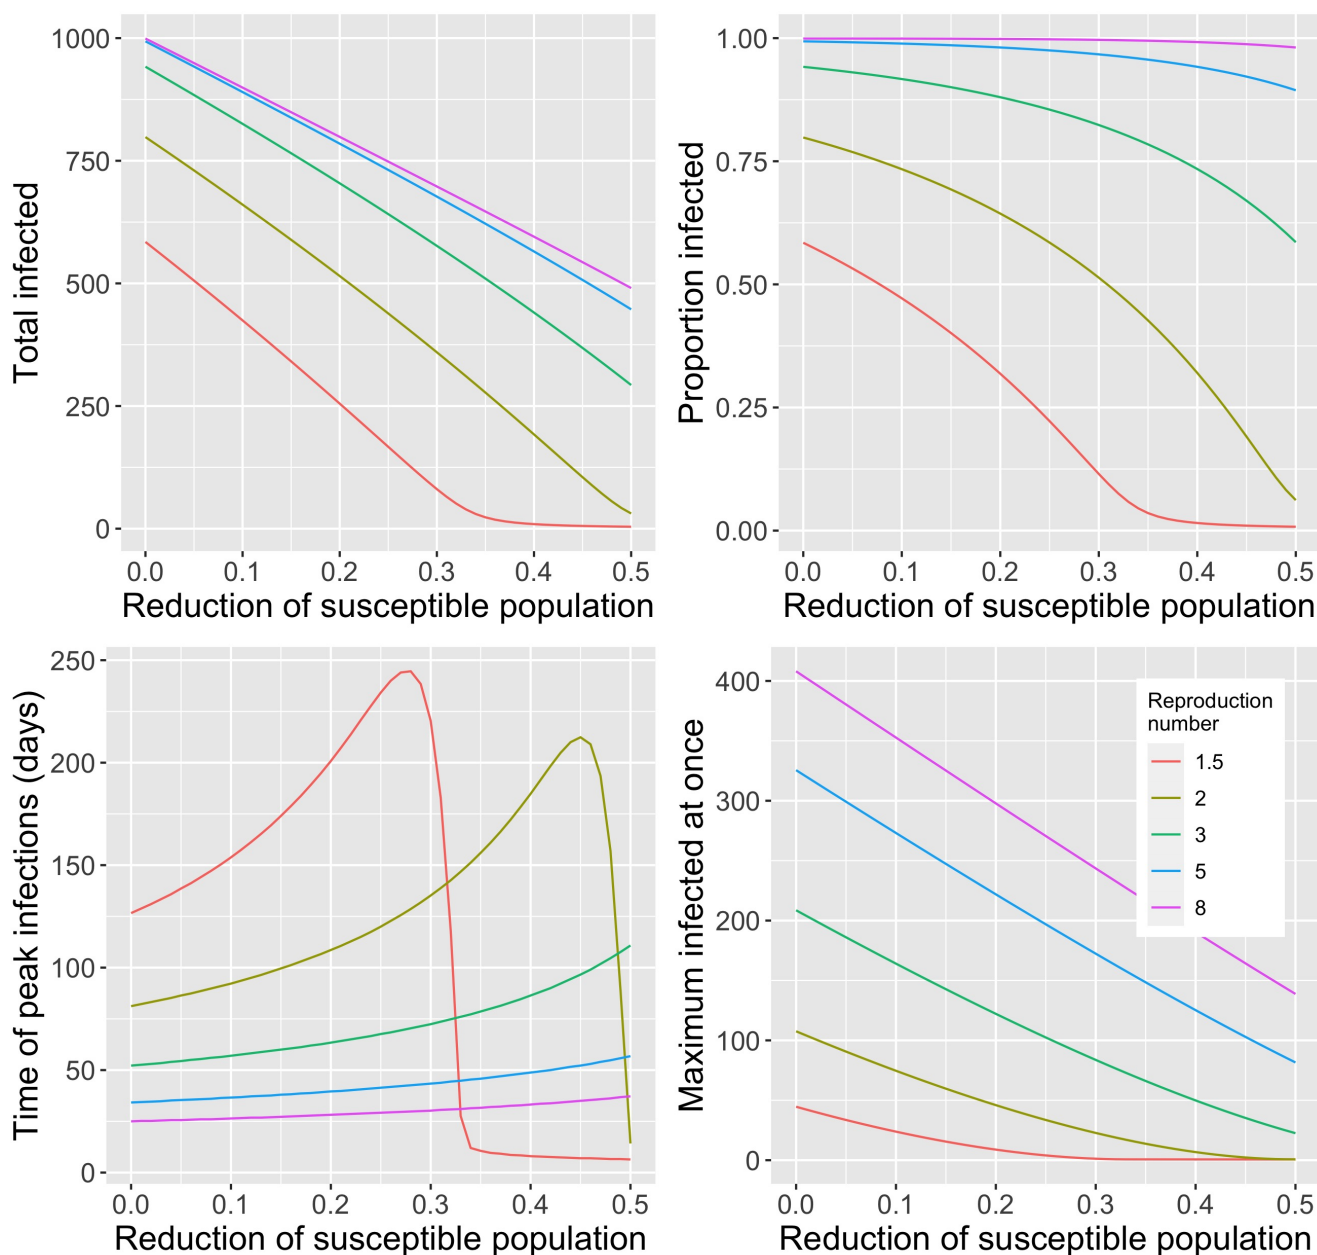

**Figure S5. Outbreak size and timing.** Each panel shows a feature of outbreak dynamics in a single residential unit as a function of control, which we have defined as the proportion of the population that is no longer susceptible due to processes such as depopulation or vaccination. The different colored lines correspond to different values of  $R_0$ , which is the reproduction number when there is no decrease in the size of the susceptible population. Results are shown for the assumption that the effective reproduction number scales directly with proportion of the population that remains susceptible (i.e.  $\Theta = 1$ ). The panels show the impact on the total number of residents who are infected (upper left), the proportion of residents who were susceptible at the start of the outbreak that become infected (upper right), the timing of the peak in the number of infectious individuals (lower left), and the maximum number who are infectious at once (lower right). Parameter values are the same as for figure S3. As a technical note, for lower values of baseline  $R_0$  the timing of the peak in the number of infectious individuals abruptly decreases when the control factor is sufficiently high because the effective reproduction number becomes less than one at the start of an outbreak and so no significant peak in infectious cases occurs.

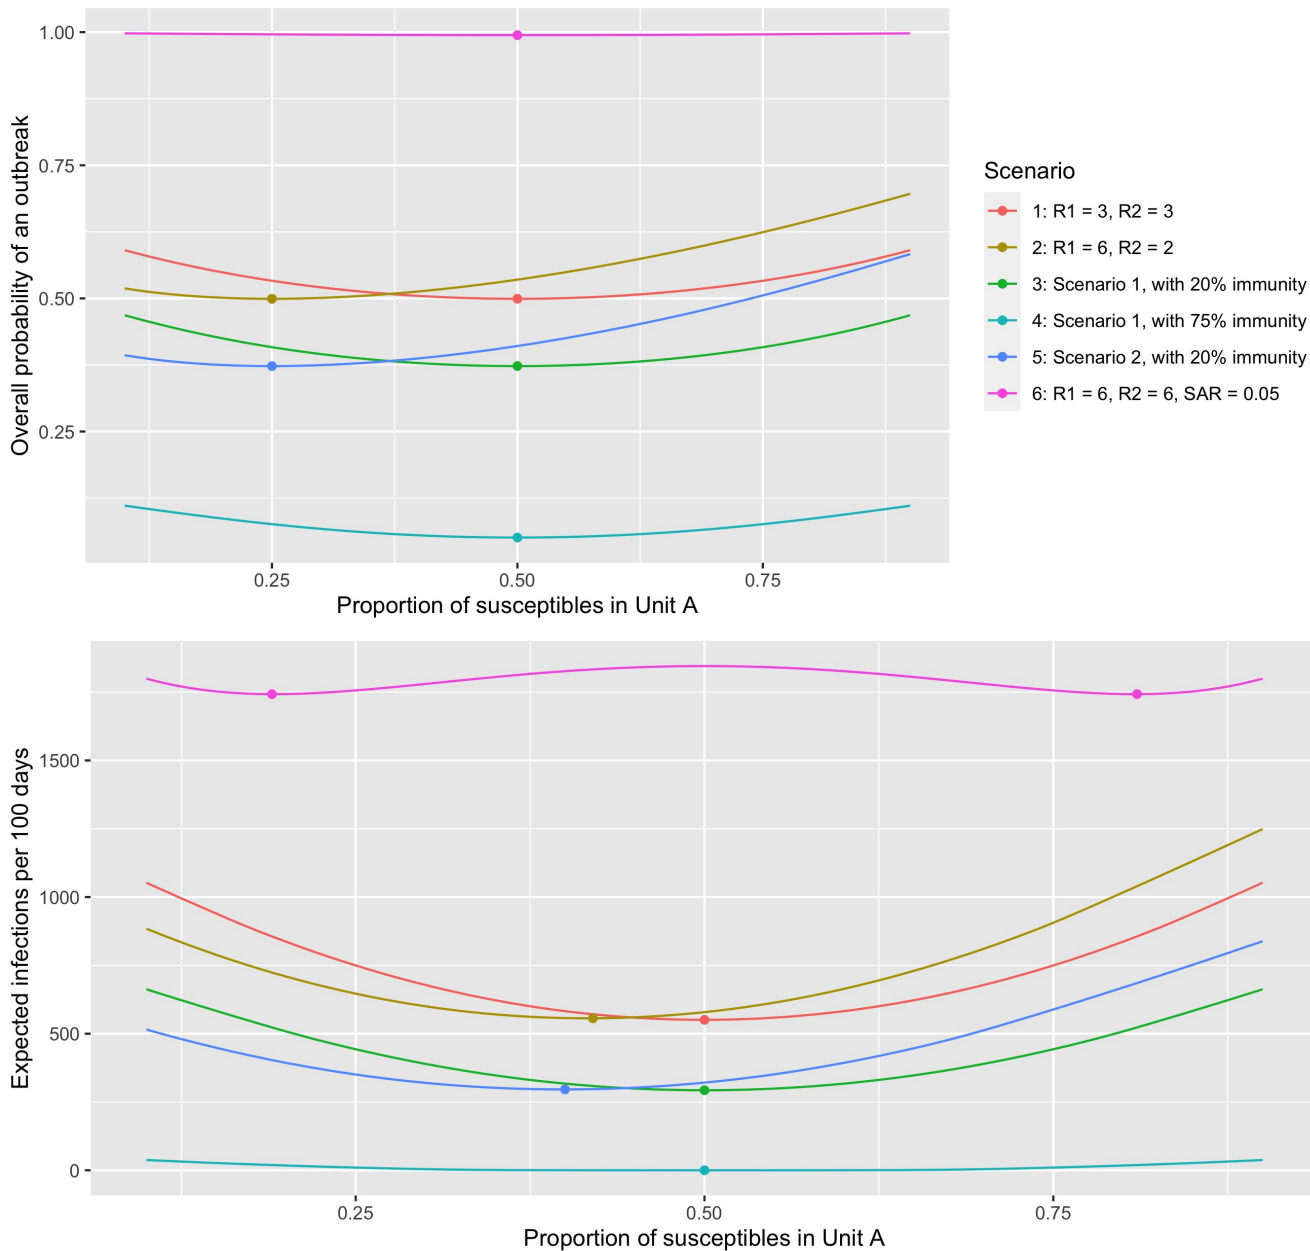

**Figure S6. Optimal distribution of residents between two independent residential units.** (Top) Probability that an outbreak occurs in at least one of two residential units within 100 days. We denote the residential units as 'Unit A' and 'Unit B'. Results are shown as a proportion of the susceptible population that is housed in Unit A. The total number of residents is assumed to be 2,000 so that if 20% of the population have immunity from vaccination, a proportion of residents housed in Unit A of 0.25 corresponds to 400 susceptible residents in Unit A and 1,200 in Unit B. The colored lines represent six different scenarios as indicated by the legend. The reproduction values in the legend correspond to the reproduction number if residents are all susceptible and distributed equally in both residential units. In scenario 1 the transmission in the two residential units are identical. In scenario 2, Unit A has higher transmission than Unit B. In scenario 3, which is designed to model a very risky housing environment, the probability that an infected staff transmits infection to a resident is increased five-fold compared to the other scenarios and the reproduction number for both residential units is high. Scenarios 4, 5 and 6, are identical to scenarios 1 or 2 except that a fraction of the residents in each residential unit have immunity from vaccination or prior infection. (Bottom) The expected number of infections per 100 days for both residential units combined is shown as a function of the proportion of residents in Unit A. The bottom panel is otherwise analogous to the top panel. Except as noted above, the parameter values are identical to figure 3.



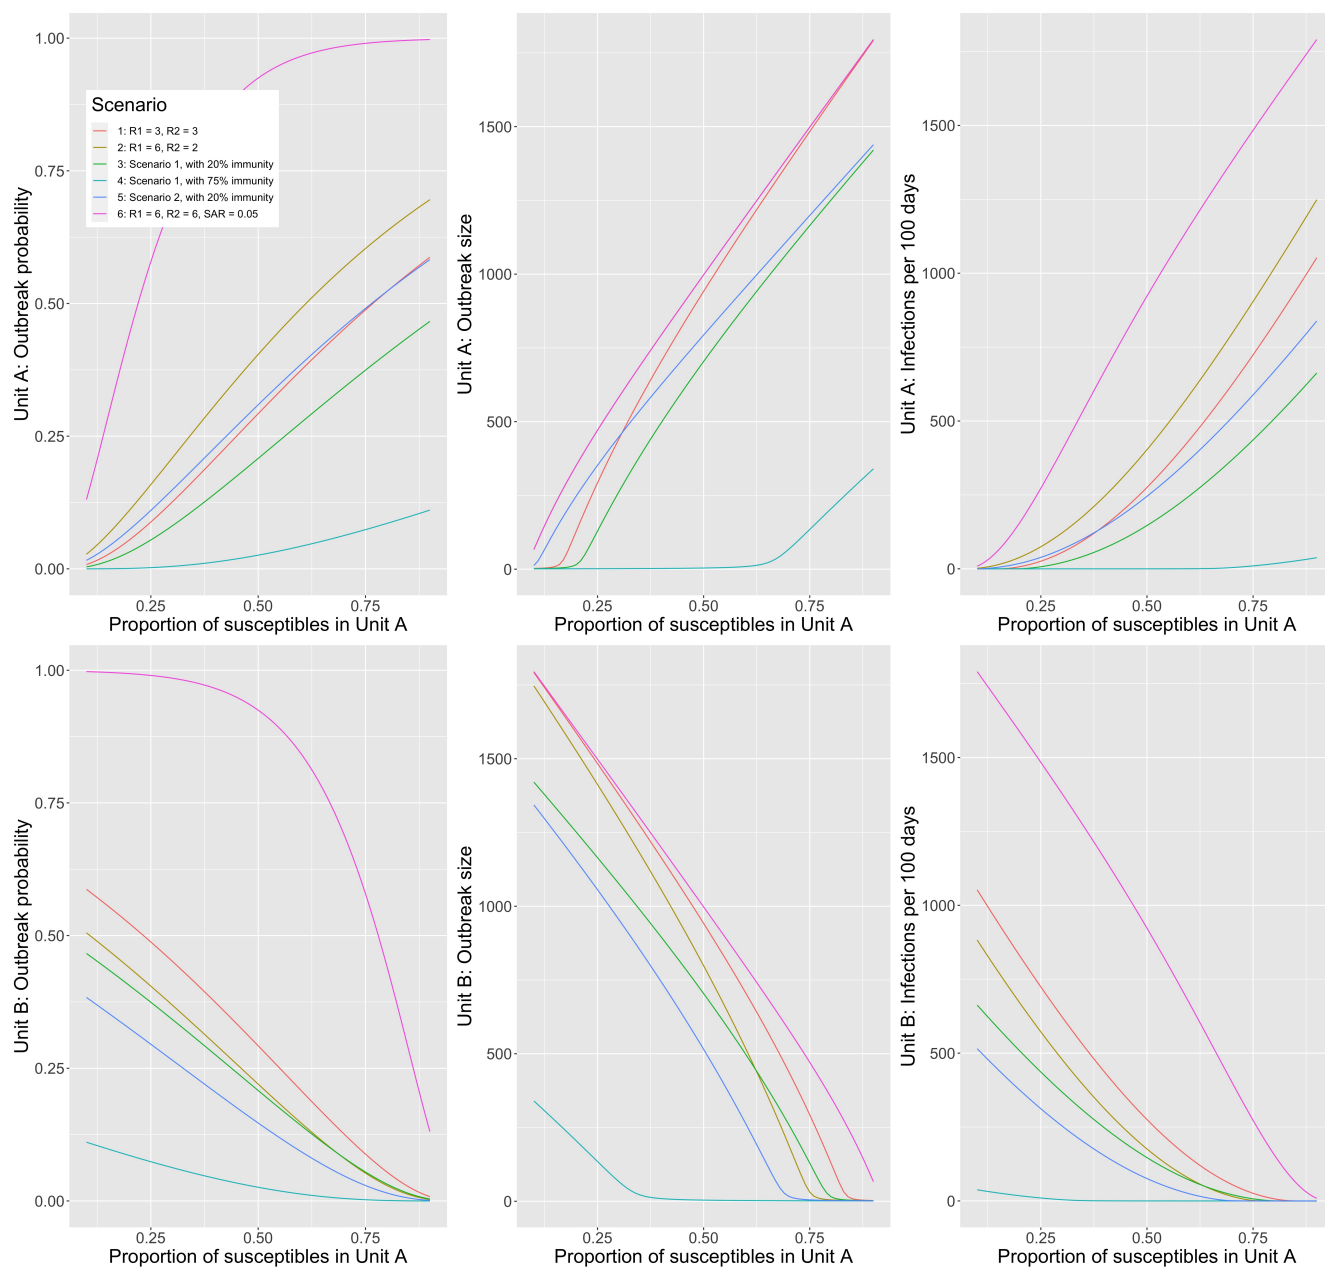

**Figure S7. Outbreak dynamics depend on how residents are distributed between two residential units.** The probability of an outbreak occurring in 100 days (left panels), expected outbreak size (middle panels) and the overall expected number of cases in 100 days (right panels) are shown as a function of the proportion of residents housed in Unit A. Top panels corresponds to Unit A and the bottom panels correspond to Unit B. Parameter values and scenarios are the same as for Figure S6.

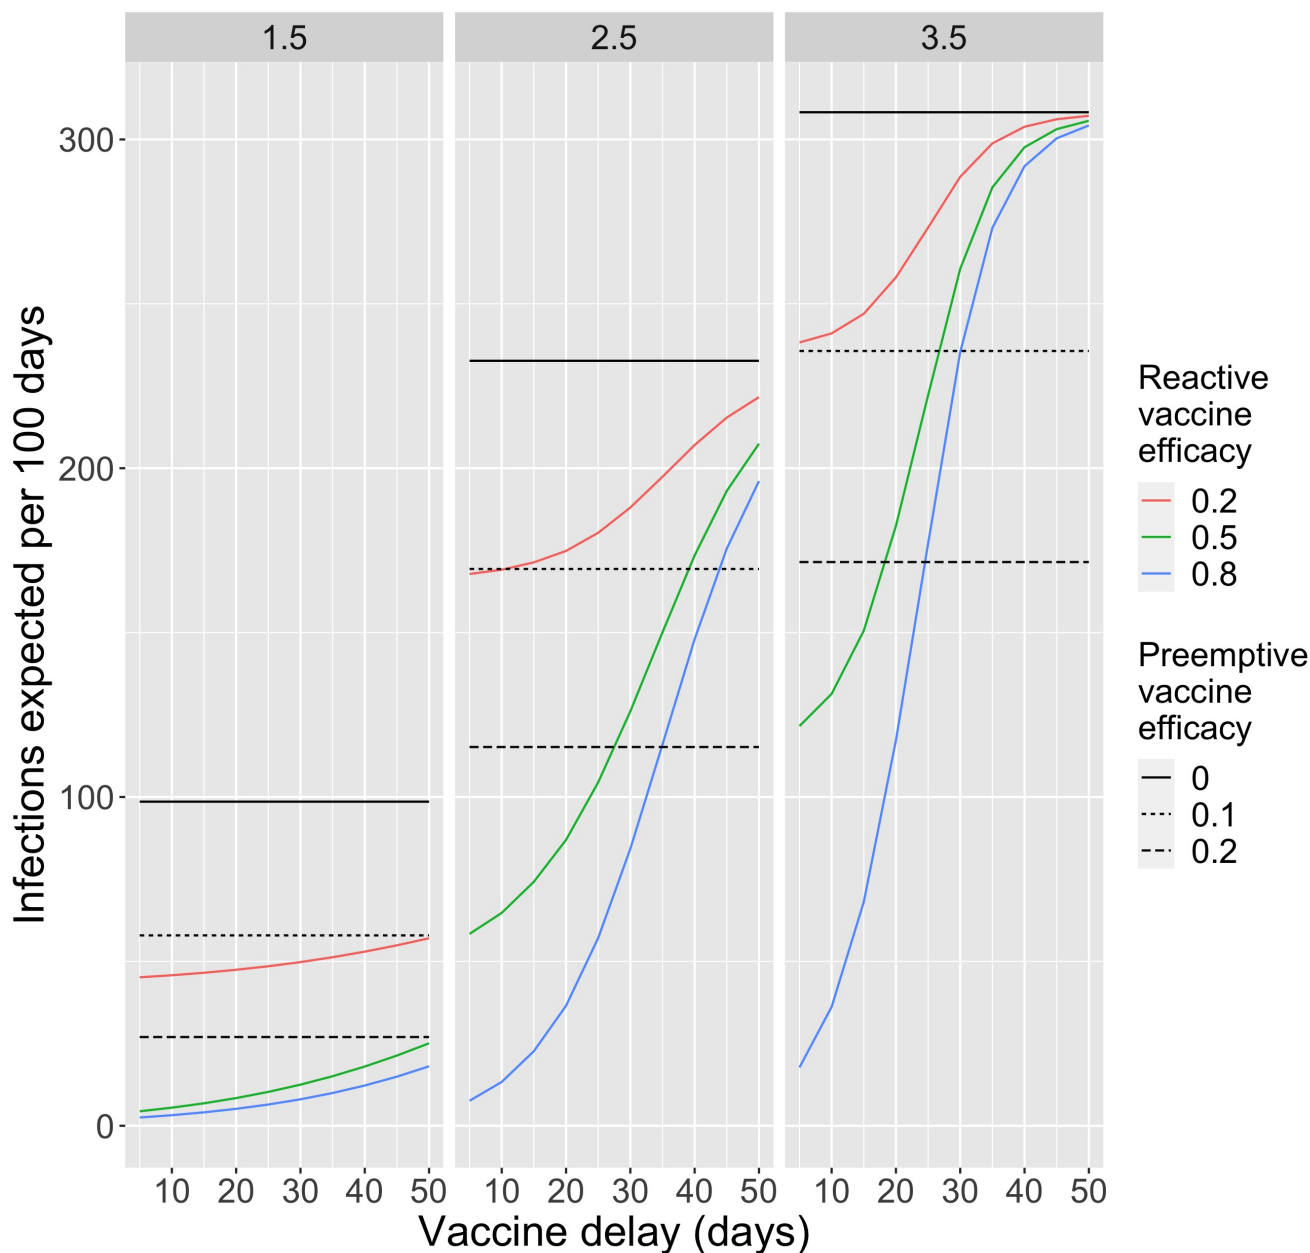

**Figure S8. Preemptive vs reactive control** The number of infections per 100 days as a function of the vaccine delay for reactive vaccination. Each vertical panel corresponds to a different value of  $R_0$  as depicted on the top bar. Horizontal black bars correspond to no control being implemented. Horizontal dashed bars correspond to preemptive control, in which immunity from vaccination has been achieved before an outbreak begins. The individual-level efficacy of preemptive vaccination is indicated in the lower legend. Colored curves indicate the expected number of infections when reactive control is implemented once ten cases in a residential unit are identified. We model reactive control as being effective at reducing transmission after a predetermined vaccine delay. The delay is depicted on the x-axis and the individual-level reactive vaccine efficacy is depicted in the upper legend. Parameter values are otherwise identical to those in Figure 3.

## References

- 345 1. Saloner, B., Parish, K., Ward, J. A., DiLaura, G. & Dolovich, S. COVID-19 Cases and Deaths in Federal and State Prisons.  
346 *JAMA* **324**, 602–603, [10.1001/jama.2020.12528](https://doi.org/10.1001/jama.2020.12528) (2020).
- 347 2. McMichael, T. M. *et al.* Epidemiology of Covid-19 in a Long-Term Care Facility in King County, Washington. *The New*  
348 *Engl. J. Medicine* **382**, 2005–2011, [10.1056/NEJMoa2005412](https://doi.org/10.1056/NEJMoa2005412) (2020).
- 349 3. Mizumoto, K., Kagaya, K., Zarebski, A. & Chowell, G. Estimating the asymptomatic proportion of coronavirus disease  
350 2019 (COVID-19) cases on board the Diamond Princess cruise ship, Yokohama, Japan, 2020. *Eurosurveillance* **25**,  
351 [10.2807/1560-7917.ES.2020.25.10.2000180](https://doi.org/10.2807/1560-7917.ES.2020.25.10.2000180) (2020).
- 352 4. Lu, J. *et al.* COVID-19 Outbreak Associated with Air Conditioning in Restaurant, Guangzhou, China, 2020 - Volume 26,  
353 Number 7—July 2020 - Emerging Infectious Diseases journal - CDC. [10.3201/eid2607.200764](https://doi.org/10.3201/eid2607.200764).
- 354 5. Park, S. Y. *et al.* Coronavirus Disease Outbreak in Call Center, South Korea. *Emerg. Infect. Dis.* **26**, 1666–1670,  
355 [10.3201/eid2608.201274](https://doi.org/10.3201/eid2608.201274) (2020).
- 356 6. Miller, S. L. *et al.* Transmission of SARS-CoV-2 by inhalation of respiratory aerosol in the Skagit Val-  
357 ley Chorale superspreading event. *Indoor Air* **31**, 314–323, <https://doi.org/10.1111/ina.12751> (2021). [\\_eprint: https://onlinelibrary.wiley.com/doi/pdf/10.1111/ina.12751](https://onlinelibrary.wiley.com/doi/pdf/10.1111/ina.12751).
- 358 7. Wodarz, D., Komarova, N. L. & Schang, L. M. Role of high-dose exposure in transmission hot zones as a driver of  
359 SARS-CoV-2 dynamics. *J. Royal Soc. Interface* **18**, 20200916, [10.1098/rsif.2020.0916](https://doi.org/10.1098/rsif.2020.0916) (2021).
- 360 8. Sanyaolu, A. *et al.* Comorbidity and its Impact on Patients with COVID-19. *SN Compr. Clin. Medicine* **2**, 1069–1076,  
361 [10.1007/s42399-020-00363-4](https://doi.org/10.1007/s42399-020-00363-4) (2020).
- 362 9. Reinhart, E. & Chen, D. L. Incarceration And Its Disseminations: COVID-19 Pandemic Lessons From Chicago’s Cook  
363 County Jail. *Heal. Aff. (Project Hope)* **39**, 1412–1418, [10.1377/hlthaff.2020.00652](https://doi.org/10.1377/hlthaff.2020.00652) (2020).
- 364 10. Montoya-Barthelemy, A. G., Lee, C. D., Cundiff, D. R. & Smith, E. B. COVID-19 and the Correctional Environment: The  
365 American Prison as a Focal Point for Public Health. *Am. J. Prev. Medicine* **58**, 888–891, [10.1016/j.amepre.2020.04.001](https://doi.org/10.1016/j.amepre.2020.04.001)  
366 (2020).
- 367 11. Henry, B. F. Social Distancing and Incarceration: Policy and Management Strategies to Reduce COVID-19 Transmission  
368 and Promote Health Equity Through Decarceration. *Heal. Educ. & Behav. The Off. Publ. Soc. for Public Heal. Educ.* **47**,  
369 536–539, [10.1177/1090198120927318](https://doi.org/10.1177/1090198120927318) (2020).
- 370 12. Vest, N. A., Johnson, O. D., Nowotny, K. M. & Brinkley-Rubinstein, L. Prison population reductions and COVID-19: A  
371 latent profile analysis synthesizing recent evidence from the Texas state prison system. *medRxiv* 2020.09.08.20190884,  
372 [10.1101/2020.09.08.20190884](https://doi.org/10.1101/2020.09.08.20190884) (2020). Publisher: Cold Spring Harbor Laboratory Press.
- 373 13. [uclalawcovid19behindbars/data](https://www.uclalawcenter.org/covid-19/behind-bars/data) (2021). Original-date: 2020-06-06T00:59:09Z.
- 374 14. Puglisi, L. B., Malloy, G. S., Harvey, T. D., Brandeau, M. L. & Wang, E. A. Estimation of COVID-19 basic reproduction  
375 ratio in a large urban jail in the United States. *Annals Epidemiol.* **53**, 103–105, [10.1016/j.annepidem.2020.09.002](https://doi.org/10.1016/j.annepidem.2020.09.002) (2021).
- 376 15. Mabud, T. S. *et al.* Evaluating strategies for control of tuberculosis in prisons and prevention of spillover into communities:  
377 An observational and modeling study from Brazil. *PLOS Medicine* **16**, e1002737, [10.1371/journal.pmed.1002737](https://doi.org/10.1371/journal.pmed.1002737) (2019).  
378 Publisher: Public Library of Science.
- 379 16. Lambert, L. A. *et al.* Tuberculosis in Jails and Prisons: United States, 20022013. *Am. J. Public Heal.* **106**, 2231–2237,  
380 [10.2105/AJPH.2016.303423](https://doi.org/10.2105/AJPH.2016.303423) (2016).
- 381 17. Baussano, I. *et al.* Tuberculosis incidence in prisons: a systematic review. *PLoS medicine* **7**, e1000381, [10.1371/journal.pmed.1000381](https://doi.org/10.1371/journal.pmed.1000381) (2010).
- 382 18. Lansbury, L. E., Brown, C. S. & Nguyen-Van-Tam, J. S. Influenza in long-term care facilities. *Influ. Other Respir. Viruses*  
383 **11**, 356–366, [10.1111/irv.12464](https://doi.org/10.1111/irv.12464) (2017). [\\_eprint: https://onlinelibrary.wiley.com/doi/pdf/10.1111/irv.12464](https://onlinelibrary.wiley.com/doi/pdf/10.1111/irv.12464).
- 384 19. Rainwater-Lovett, K., Chun, K. & Lessler, J. Influenza outbreak control practices and the effectiveness of interventions in  
385 long-term care facilities: a systematic review. *Influ. Other Respir. Viruses* **8**, 74–82, [10.1111/irv.12203](https://doi.org/10.1111/irv.12203) (2014). [\\_eprint: https://onlinelibrary.wiley.com/doi/pdf/10.1111/irv.12203](https://onlinelibrary.wiley.com/doi/pdf/10.1111/irv.12203).
- 386 20. Cheng, H.-Y. *et al.* Contact Tracing Assessment of COVID-19 Transmission Dynamics in Taiwan and Risk at Different  
387 Exposure Periods Before and After Symptom Onset. *JAMA internal medicine* **180**, 1156–1163, [10.1001/jamainternmed.  
388 2020.2020](https://doi.org/10.1001/jamainternmed.2020.2020) (2020).
- 389 390 391 392

- 393 **21.** He, X. *et al.* Temporal dynamics in viral shedding and transmissibility of COVID-19. *Nat. Medicine* **26**, 672–675,  
394 [10.1038/s41591-020-0869-5](https://doi.org/10.1038/s41591-020-0869-5) (2020).
- 395 **22.** Lauer, S. A. *et al.* The Incubation Period of Coronavirus Disease 2019 (COVID-19) From Publicly Reported Confirmed  
396 Cases: Estimation and Application. *Annals Intern. Medicine* [10.7326/M20-0504](https://doi.org/10.7326/M20-0504) (2020).
- 397 **23.** Byrne, A. W. *et al.* Inferred duration of infectious period of SARS-CoV-2: rapid scoping review and analysis of available  
398 evidence for asymptomatic and symptomatic COVID-19 cases. *BMJ open* **10**, e039856, [10.1136/bmjopen-2020-039856](https://doi.org/10.1136/bmjopen-2020-039856)  
399 (2020).
- 400 **24.** Walsh, K. A. *et al.* The duration of infectiousness of individuals infected with SARS-CoV-2. *J. Infect.* **81**, 847–856,  
401 [10.1016/j.jinf.2020.10.009](https://doi.org/10.1016/j.jinf.2020.10.009) (2020).
- 402 **25.** CDCR. Population Reports.
- 403 **26.** Lloyd-Smith, J. O., Schreiber, S. J., Kopp, P. E. & Getz, W. M. Superspreading and the effect of individual variation on  
404 disease emergence. *Nature* **438**, 355–359, [10.1038/nature04153](https://doi.org/10.1038/nature04153) (2005). Number: 7066 Publisher: Nature Publishing  
405 Group.
- 406 **27.** Althouse, B. M. *et al.* Superspreading events in the transmission dynamics of SARS-CoV-2: Opportunities for interventions  
407 and control. *PLOS Biol.* **18**, e3000897, [10.1371/journal.pbio.3000897](https://doi.org/10.1371/journal.pbio.3000897) (2020). Publisher: Public Library of Science.
- 408 **28.** Adam, D. C. *et al.* Clustering and superspreading potential of SARS-CoV-2 infections in Hong Kong. *Nat. Medicine* **26**,  
409 1714–1719, [10.1038/s41591-020-1092-0](https://doi.org/10.1038/s41591-020-1092-0) (2020). Number: 11 Publisher: Nature Publishing Group.
- 410 **29.** Susswein, Z. & Bansal, S. Characterizing superspreading of SARS-CoV-2 : from mechanism to measurement. *medRxiv:*  
411 *The Prepr. Serv. for Heal. Sci.* [10.1101/2020.12.08.20246082](https://doi.org/10.1101/2020.12.08.20246082) (2020).
- 412 **30.** Blumberg, S. & Lloyd-Smith, J. O. Inference of R0 and Transmission Heterogeneity from the Size Distribution of Stuttering  
413 Chains. *PLOS Comput. Biol.* **9**, e1002993, [10.1371/journal.pcbi.1002993](https://doi.org/10.1371/journal.pcbi.1002993) (2013). Publisher: Public Library of Science.
- 414 **31.** Blumberg, S., Funk, S. & Pulliam, J. R. C. Detecting differential transmissibilities that affect the size of self-limited  
415 outbreaks. *PLoS pathogens* **10**, e1004452, [10.1371/journal.ppat.1004452](https://doi.org/10.1371/journal.ppat.1004452) (2014).
- 416 **32.** Miller, J. C. A note on the derivation of epidemic final sizes. *Bull. mathematical biology* **74**, 2125–2141, [10.1007/  
417 s11538-012-9749-6](https://doi.org/10.1007/s11538-012-9749-6) (2012).
- 418 **33.** May, R. M. & Anderson, R. M. Spatial heterogeneity and the design of immunization programs. *Math. Biosci.* **72**, 83–111,  
419 [10.1016/0025-5564\(84\)90063-4](https://doi.org/10.1016/0025-5564(84)90063-4) (1984).
